1 **HLA class II polymorphism influences the immune response to**  
2 **protective antigen and susceptibility to *Bacillus anthracis***

3

4 **Short title:** HLA class II and anthrax PA

5

6 Stephanie Ascough<sup>1</sup>, Rebecca J. Ingram<sup>2</sup>, Karen K. Y. Chu<sup>1</sup>, Stephen J. Moore<sup>3</sup>, Theresa  
7 Gallagher<sup>4</sup>, Hugh Dyson<sup>5</sup>, Mehmet Doganay<sup>6</sup>, Gökhan Metan<sup>7</sup>, Yusuf Ozkul<sup>6</sup>, Les  
8 Baillie<sup>8</sup>, E. Diane Williamson<sup>5</sup>, John H. Robinson<sup>9</sup>, Bernard Maillere<sup>10</sup>, Rosemary J.  
9 Boyton<sup>1</sup>, and Daniel M. Altmann<sup>1\*</sup>

10

11 <sup>1</sup> Department of Medicine, Imperial College, London, UK

12 <sup>2</sup> Centre for Infection and Immunity, Queen's University Belfast, Belfast, UK

13 <sup>3</sup> Sanofi, South San Francisco, CA, USA

14 <sup>4</sup> BioMET, University of Maryland School of Medicine, Baltimore, MD, USA

15 <sup>5</sup> Defence Science Technology Laboratory, Porton Down, Salisbury, UK

16 <sup>6</sup> Department of Medical Genetics, Erciyes University Hospital, Kayseri, Turkey

17 <sup>7</sup> Department of Infectious Disease, Erciyes University Hospital, Kayseri, Turkey

18 <sup>8</sup> School of Pharmacy and Pharmaceutical Sciences, Cardiff University, Cardiff, UK

19 <sup>9</sup> Institute for Cellular Medicine, Newcastle University, Newcastle upon Tyne, UK

20 <sup>10</sup> CEA-Saclay, Université Paris-Saclay, SIMOPRO, Gif-sur-Yvette, France.

21

22 **Key words:** anthrax; protective antigen; HLA class II; HLA transgenic; CD4 epitope;  
23 HLA-binding; bacterial immunity

24

25 **\*Corresponding author:**

26 Professor Daniel M. Altmann

27 Department of Medicine, Imperial College

28 Hammersmith Hospital, Du Cane Road

29 London, W12 0NN, United Kingdom

30 [d.altmann@imperial.ac.uk](mailto:d.altmann@imperial.ac.uk)

## 32 **Abstract**

33 The causative agent of anthrax, *Bacillus anthracis*, evades the host immune response and  
34 establishes infection through the production of binary exotoxins composed of Protective  
35 Antigen (PA) and one of two subunits, lethal factor (LF) or edema factor (EF). The  
36 majority of vaccination strategies have focused upon the antibody response to the PA  
37 subunit. We have used a panel of humanised HLA class II transgenic mouse strains to  
38 define HLA-DR-restricted and HLA-DQ-restricted CD4<sup>+</sup> T cell responses to the  
39 immunodominant epitopes of PA. This was correlated with the binding affinities of  
40 epitopes to HLA class II molecules, as well as the responses of two human cohorts:  
41 individuals vaccinated with the Anthrax Vaccine Precipitated (AVP) vaccine (which  
42 contains PA and trace amounts of LF), and patients recovering from cutaneous anthrax  
43 infections. The infected and vaccinated cohorts expressing different HLA types were  
44 found to make CD4<sup>+</sup> T cell responses to multiple and diverse epitopes of PA. The effects  
45 of HLA polymorphism were explored using transgenic mouse lines, which demonstrated  
46 differential susceptibility, indicating that HLA-DR1 and HLA-DQ8 alleles conferred  
47 protective immunity relative to HLA-DR15, HLA-DR4 and HLA-DQ6. The HLA  
48 transgenics enabled a reductionist approach, allowing us to better define CD4<sup>+</sup> T cell  
49 epitopes. Appreciating the effects of HLA polymorphism on the variability of responses  
50 to natural infection and vaccination will be vital in planning protective strategies against  
51 anthrax.

52

## 53 **Author Summary**

54 The bacterium responsible for causing the disease anthrax, *Bacillus anthracis*, produces a  
55 binary toxin composed of Protective Antigen (PA) and either Lethal Factor (LF) or  
56 Edema Factor (EF). Previous vaccination strategies have focused upon the antibody  
57 response to the PA subunit. However, within the field of bacterial immunity, there is a  
58 growing appreciation of the importance of the adaptive immune response, specifically led  
59 by CD4<sup>+</sup> T cells. We identified long-term CD4<sup>+</sup> T cell responses to PA epitopes  
60 following cutaneous human anthrax infection and vaccination, indicating that this toxin  
61 component is a principle *B. anthracis* antigen. To characterise the impact of  
62 polymorphism in HLA class II alleles at DR and DQ loci, we used transgenic mice to  
63 map the immunodominant epitopes from PA. This was correlated with survival in the  
64 transgenic lines following live anthrax challenge. We were able to demonstrate the  
65 differential impact of HLA class II alleles upon the CD4<sup>+</sup> T cell immunodominant  
66 epitopes which shaped the immune hierarchy and therefore susceptibility to anthrax  
67 infection.

68

## 69 **Introduction**

70 Anthrax is an acute zoonotic disease that primarily affects grazing mammals, although  
71 the causative agent, *Bacillus anthracis*, also infects humans and is found in many parts of  
72 the developing world, where the majority of natural human infection occurs [1].  
73 Infections in humans, which may be fatal, depending upon the route of infection, are  
74 usually confined to agricultural workers, those who eat infected carcasses and those who  
75 handle the skins and coats of infected animals [2]. Over past decades, the need to protect

76 individuals from occupational exposure has combined with fears regarding the use of  
77 anthrax as a bioweapon, to drive the development of vaccines based on the toxins  
78 produced by the bacteria [1]. Such concerns have resurfaced recently in relation to  
79 potential anthrax weaponisation [3]. Furthermore, there have been recent cases in  
80 Northern Europe of anthrax infections in intravenous drug users as a consequence of  
81 contaminated drug supplies [4]. There are also growing concerns regarding the effect of  
82 climate change in the Arctic upon the release of potentially viable anthrax spores from  
83 melting permafrost [5].

84  
85 The three toxins of *B. anthracis*, Protective Antigen (PA), Lethal Factor (LF) and Edema  
86 Factor (EF) combine in a binary fashion, so that coupling PA with LF or EF produces  
87 Lethal Toxin (LT) or Edema Toxin (ET), respectively [6]. The two predominantly used  
88 vaccines, the United States-licensed Anthrax Vaccine Adsorbed (AVA; trade name  
89 BioThrax) and the United Kingdom-licensed vaccine, Anthrax Vaccine Precipitated  
90 (AVP), are culture filtrate vaccines containing PA and variable amounts of LF and EF [7].  
91 Both vaccines are administered intramuscularly: AVA is given as three initial doses at 0, 1  
92 and 6 months, while AVP is administered as a primary series of four vaccinations at 0, 3, 6  
93 and 32 weeks [6]; a booster vaccination at 12 months, after the primary series for each  
94 vaccine, is then required. The requirement for an intensive vaccination regimen, as well as  
95 concerns about adverse reaction rates as high as 11% for the UK vaccine [8], and up to 60%  
96 for the US vaccine [9], have prompted interest in streamlined vaccination schedules or the  
97 development of effective, safe, subunit vaccines [10, 11].

98

99 Second-generation anthrax vaccines under development are based on the administration of  
100 the immunogenic anthrax toxins, specifically recombinant protective antigen (rPA). Human  
101 clinical trials have indicated that these rPA vaccines may be capable of eliciting robust  
102 cellular and humoral immune responses, whilst avoiding the adverse reactions associated  
103 with older filtrate-based vaccines [12-14].

104

105 PA-specific monoclonal antibodies generated from AVA-vaccinated humans were found to  
106 neutralise LT in vitro, and passive transfer of these antibodies provided protection in mouse  
107 models of LT challenge [15, 16]. Although it is possible to show passive transfer of immunity  
108 with toxin-neutralising antibodies [17], Crowe *et al.* found that over half of AVA-vaccinated  
109 individuals demonstrated no detectable toxin-neutralising effect; despite the presence of anti-  
110 PA antibodies in the majority of vaccinated individuals [18]. Studies in rhesus macaques  
111 have demonstrated that AVA administration is capable of providing protection from  
112 subsequent spore challenge, with a Th1/Th2 profile predictive of survival, even in the  
113 presence of very low levels of circulating anti-PA antibody [19].

114

115 Protection afforded by a response to PA in both rodent and non-human primate models has  
116 been suggested to be T-cell mediated [20, 21]. Plasmid vaccination in mice induces high  
117 antibody titres as well as PA-specific Th1 immunity and induction of a high level of IFN $\gamma$   
118 secretion [22]. Doolan and colleagues reported that individuals exposed to anthrax spores in  
119 the US mail service incident experienced dose-dependent priming of T cell immunity, and, to  
120 a lesser extent, of B cell immunity against PA [23]; low-level anthrax exposure led to PA T  
121 cell responses in the absence of detectable antibodies. While Glomski *et al* found that, in  
122 contrast to humoral immunity, IFN $\gamma$  production by CD4<sup>+</sup> T cells protected mice against  
123 capsulated *B. anthracis* infection [24].

124

125 Work from our lab has shown that individuals naturally exposed to anthrax spores  
126 demonstrate IFN $\gamma$  secreting antigen-specific CD4<sup>+</sup> T cell immunity to PA and LF, which for  
127 PA, showed correlation between the magnitude of response and the duration of the infection  
128 [25, 26]. We also found that a survivor of injectional anthrax developed strong, potentially  
129 protective, T cell immunity to several commonly immunodominant epitopes of PA and LF,  
130 previously described in Turkish patients [27]. This evidence suggests that cellular immunity  
131 has a critical role to play in vaccine mediated clearance of *B. anthracis*.

132

133 Whether the future of anthrax vaccinology lies with third-generation, subunit vaccines or  
134 with improved protocols for priming with existing vaccines, the need has never been greater  
135 to fully comprehend the nature of effective immunity to *B. anthracis*, and the impact of  
136 immunogenetic diversity. Here we describe a combined approach to characterising CD4<sup>+</sup> T  
137 cell immunity to the PA toxin. This encompasses comprehensive analysis of T cell epitopes  
138 through investigation of HLA class II binding, mapping of responses in a panel of HLA class  
139 II transgenic mice, live challenge studies in HLA transgenic mice and studies of infected or  
140 vaccinated human donors. Our results show PA to be highly CD4<sup>+</sup> T cell epitope-rich, with  
141 variable immunodominance which is dependent on HLA class II genotype. As discussed  
142 below, this has implications for wide-scale roll-out and assessment of PA-based vaccines.

## 144 **Results**

### 145 ***CD4+ T cell responses to B. anthracis PA epitopes in anthrax-recovered*** 146 ***patients and vaccinees***

147 We have previously described T cell memory responses to anthrax antigens in a cohort  
148 of individuals who suffered clinical disease after natural, occupational exposure [25, 26,  
149 28]. These were agricultural workers from the Kayseri region of Turkey who had been in  
150 contact with infected livestock and been hospitalised with confirmed cutaneous anthrax  
151 infections. PBMCs were collected for immune analysis at 0.4 to 7.5 years after recovery  
152 under antibiotic therapy. In earlier studies, we described the fact that responses to  
153 recombinant PA and LF antigens were higher in naturally exposed individuals than in  
154 vaccinees receiving a full course of the UK AVP anthrax vaccine. Furthermore, immune  
155 responses in naturally infected donors were characterised by a broad cytokine profile,  
156 encompassing IL-2, IL-5, IL-9 and IL-13 [29]. In the present study we sought to analyse  
157 in greater detail the epitope specificity of vaccinated and infected individuals to PA. PA  
158 epitopes were screened by looking for ELISpot responses to a panel of 73 overlapping  
159 peptides of 20mers overlapping by 10 amino acid residues and analysed in pools of six. A  
160 total of 26 peptides were identified as epitopes in at least one AVP vaccinee (Fig 1), of  
161 which only 7 epitopes were an immune target for more than one vaccinee. Of note is the  
162 finding that only 4 vaccinees (AVP vaccinees donors 1-4) out of 10 responded to any  
163 epitopes, and of these the majority of the responses were elicited in donor 3, who  
164 responded to a total of 21 epitopes (Table S1). Although this study was not powered to  
165 make assumptions regarding the involvement of HLA alleles in the presentation of

166 anthrax peptides, it is interesting that HLA-DR11 and DR13 were over-represented in the  
167 population of donors responding to the peptides contained within the vaccine. In contrast,  
168 the majority of infected individuals (7 out of 9 donors) responded to at least one PA  
169 epitope, and there did not appear to be any particular bias towards specific HLA alleles in  
170 the responses (Fig S2), with 69 of the 73 peptides analysed in this cohort found to carry  
171 infection-specific epitopes. Peptides such as PA 168-187 and PA 651-670 contained  
172 epitopes that were recognised with a high frequency response by multiple individuals (PA  
173 168-187 mean = 264.2 spots/million,  $\pm 123.2$  SEM, and PA 651-670 mean = 273.4  
174 spots/million,  $\pm 123.6$  SEM) and encompassing diverse HLA class II alleles. However, it  
175 is notable that although adjacent peptides (PA 161-187 and PA 641-660 respectively)  
176 were identified as epitopes for one of the vaccinated individuals, neither of the infection-  
177 specific epitopes, recognised in the context of multiple HLA alleles, were a focus of the  
178 response in any vaccinees.

179  
180 In both infected and vaccinated cohorts, the epitopes came from sequences within all four  
181 domains of PA (Fig 1), indicating that, unlike LF, the majority of PA epitopes are not  
182 clustered within a single domain of the protein [25]. This comparison also highlights the  
183 fact that individuals who had been hyper-immunised on the standard UK schedule with  
184 seven to 14 doses of the AVP vaccine over 3.5 to 10 years, responded to fewer epitopes  
185 than infected individuals, with no epitopes identified that were present in the context of  
186 vaccination alone. This supported the suggestion, which we originally made in regard to  
187 LF; that live infection unveils cryptic anthrax epitopes not commonly recognised after  
188 administration of the protein antigen.



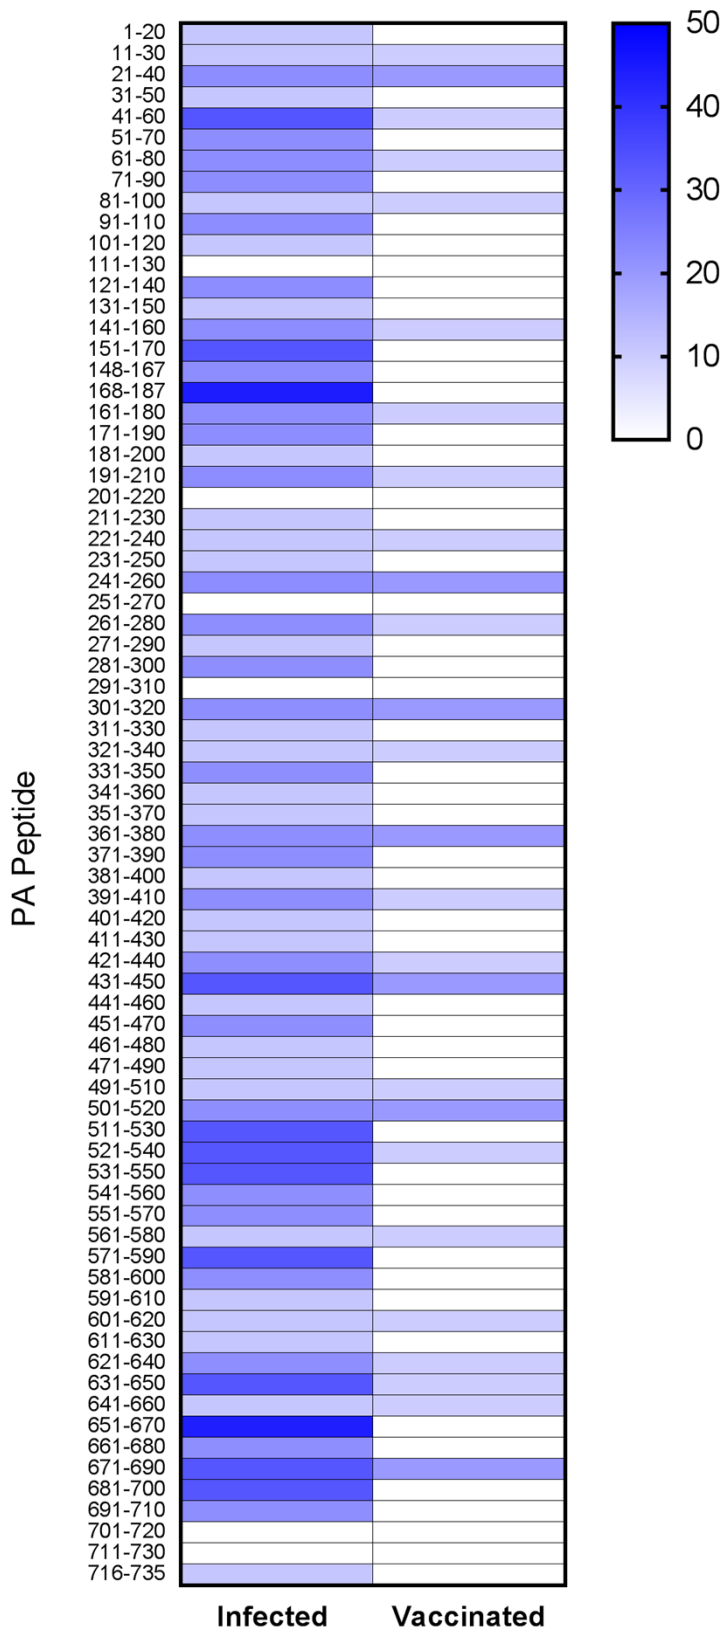

190 **Figure 1.**  
191

192 ***Differential susceptibility to *B. anthracis* challenge in HLA transgenic***  
193 ***mice***

194 In order to more precisely define the contribution of different HLA class II alleles to  
195 anthrax and PA immunity, we turned to HLA class II transgenic mice as a defined,  
196 reductionist model allowing analysis of individual alleles in isolation.

197  
198 We initially compared susceptibility of mice expressing either HLA-DR1 or HL-DQ8 to  
199 challenge with  $1 \times 10^6$  CFU ( $10^3$  median lethal doses, MLD) *B. anthracis* STI strain. HLA-  
200 DR1 mice were resistant to *B. anthracis* STI challenge (MLD  $> 10^6$  CFU), while HLA-  
201 DQ8 mice were also relatively resistant, with 80% survival. The more susceptible HLA  
202 class II transgenic mice demonstrated differential susceptibility to challenge at  $10^5$  CFU  
203 ( $10^2$  MLD *B. anthracis* STI) with the following survival rates: DQ6 mice (100%), DR4  
204 (80%), and DR15 (55%). By comparison, the parent strain for the HLA class II  
205 transgenics, C57BL6, showed 40% survival against a  $10^5$  CFU contemporaneous  
206 challenge with the STI vaccine strain of *B. anthracis*.

207

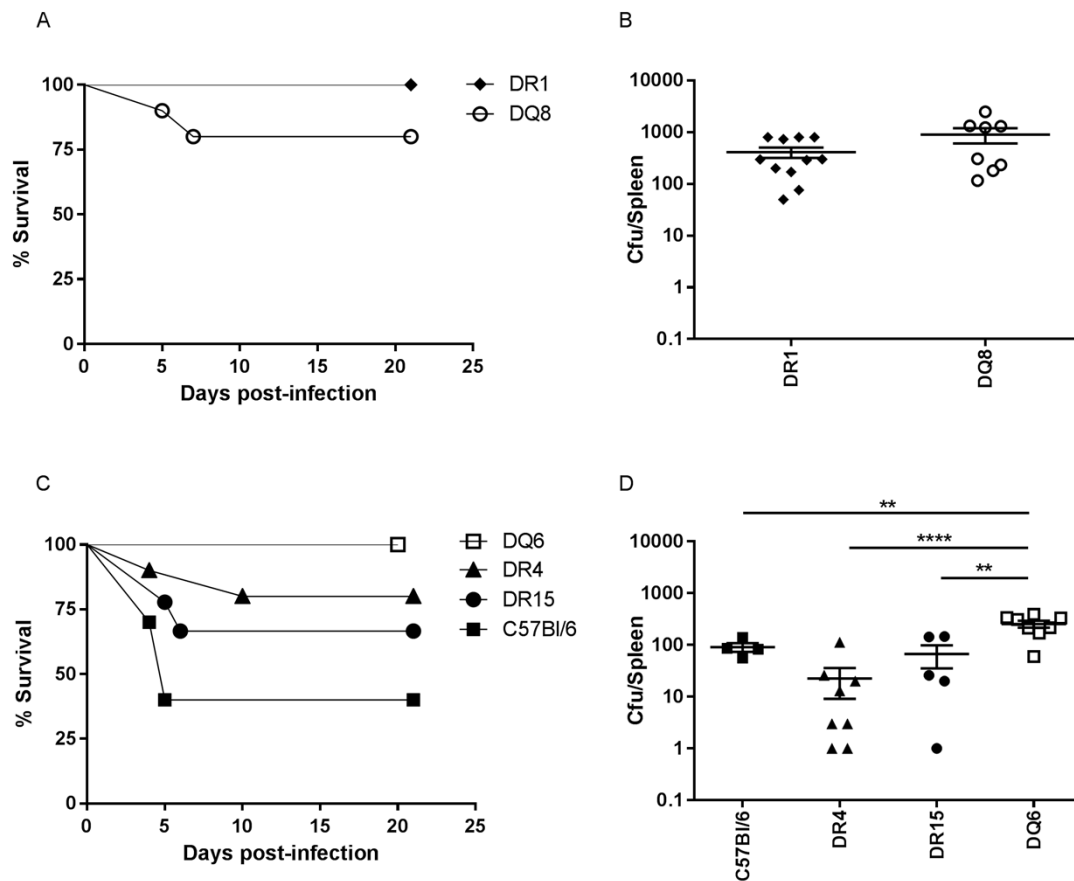

208

209 **Figure 2.**

210

211 The bacterial loads recovered from the spleens of individual surviving mice of each strain  
212 at day 20 are shown in Fig 2. In general the mean bacterial loads in spleens at day 20  
213 post-infection were lower than, but proportional to, the original challenge dose level. The  
214 groups challenged with  $10^6$  CFU (DR1, DQ8) had high bacterial loads, although the mean  
215 bacterial loads for the DQ6 mice (challenged with  $10^5$  CFU) did not differ significantly  
216 from those for the DR1 or DQ8 mice, which had been challenged with ten-fold more  
217 bacteria, suggesting that the DQ6 mice were slower to clear the infection.

218

219 HLA transgenic mice were less susceptible to infection with *B. anthracis* STI strain than  
220 the parent strain C57BL6 mice. HLA-DR1 mice were resistant to infection with a high-  
221 level challenge ( $10^6$  CFU). DQ6 strain mice were resistant to  $10^5$  CFU and relatively slow  
222 to clear the infection. The order of susceptibility of mouse strains to *B. anthracis*  
223 infection was determined to be: C57Bl6 > DR15 > DR4 > DQ6 > DQ8 > DR1.

224

### 225 ***CD4<sup>+</sup> T cell responses to B. anthracis PA epitopes in HLA transgenic mice***

226 The greater immunogenetic complexity of HLA-outbred human populations makes it  
227 considerably more challenging to define the restricting HLA molecule responsible for  
228 antigen presentation; the HLA class II transgenic mouse models offer a reductionist  
229 system in which to define HLA-restricted epitopes of relevance to humans carrying the  
230 same alleles. Using these transgenic models in protein and peptide immunisation we were  
231 able to build a comprehensive picture of immunodominant HLA class II restricted  
232 epitopes derived from PA. Mice were immunised with the recombinant PA protein and  
233 draining lymph node cells were restimulated with a peptide library spanning the PA  
234 sequence (73 peptides in total, with some peptides overlapping the boundaries between  
235 domains: domain 1 = PA 1-20 to PA 241-260; domain 2 = PA 251-270 to PA 471-490;  
236 domain 3 = PA 491-510 to PA 581-600; domain 4 = PA 591-610 to PA 716-735.). After  
237 immunisation with the recombinant protein of interest, all HLA transgenic mice  
238 responded to the whole rPA (Fig 3), but the response to the individual peptides was found  
239 to be HLA-specific.

240

241 We investigated whether there might be any correlation between susceptibility of the  
242 HLA transgenic lines to challenge and the breadth of T cell epitope recognition. Antigen-  
243 specific T cell responses to all stimulatory peptides were further investigated by peptide  
244 immunisation and screening (Figs S1, S2 and S3). In total, 6 HLA-DR1 restricted  
245 epitopes were identified: PA 41-60, PA 361-380, PA 371-390, PA 561-580, PA 631-650,  
246 and PA 681-700 (Fig 3A and Fig S3). In comparison 14 HLA-DQ8 restricted epitopes  
247 were identified: PA 141-160, PA 151-170, PA 191-210, PA 201-220, PA 301-320, PA  
248 331-350, PA 481-500, PA 491-510, PA 501-520, PA 591-610, PA 601-620, PA 651-670,  
249 PA 711-730, and PA 716-735 (Fig 3B and Fig S1): and 15 HLA-DR4 restricted epitopes  
250 were identified: PA 31-50, PA 51-70, PA 71-90, PA 121-140, PA 221-240, PA 321-340,  
251 PA 331-350, PA 371-390, PA 451-470, PA 461-480, PA 591-610, PA 601-620, PA 641-  
252 660, PA 681-700, and PA 711-730 (Fig 3C and Fig S2). Whilst some of these epitopes  
253 were recognised by more than one HLA type (PA 331-350, PA 591-610, PA 601-620 and  
254 PA 711-730 were constituents of both DR4 and DQ8 responses, while PA 371-390 and  
255 PA 681-700 were recognised by both DR1 and DR4 alleles), no one epitope was found to  
256 provoke a response in all 3 HLA alleles tested. Thus, it was noteworthy that HLA-DR1  
257 transgenic mice, which were the least susceptible to anthrax challenge, responded to  
258 fewer epitopes with a reduced repertoire of CD4<sup>+</sup> T cell recognition than the other HLA  
259 alleles screened.

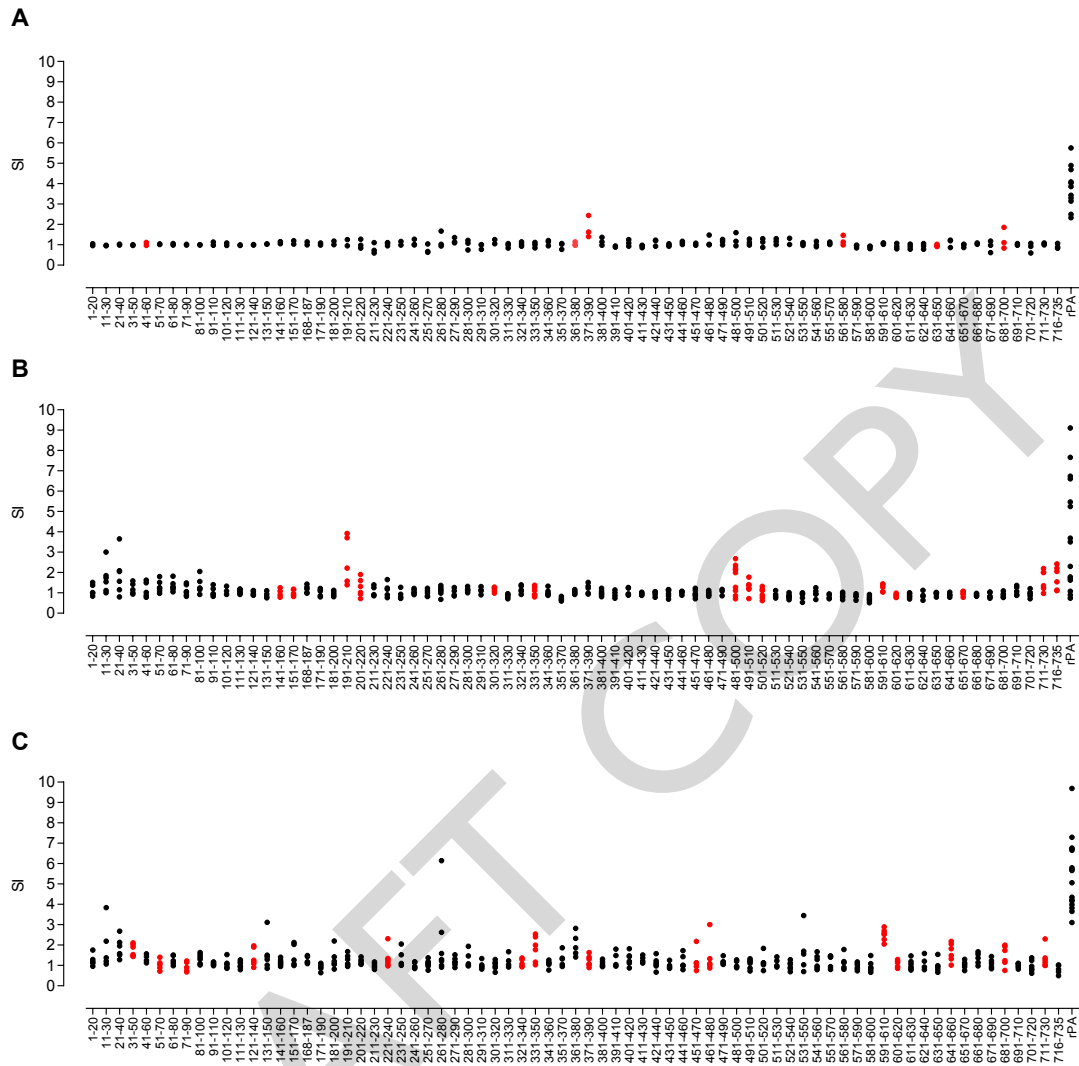

260

261 **Figure 3.**

262

263 ***The differential PA peptide binding across distinct HLA polymorphisms***

264 Overlapping 20-mer peptides that represented the whole PA protein sequence were

265 evaluated for binding affinity to seven common HLA-DR alleles and two common HLA-

266 DQ alleles (Table 1). The two epitopes that were recognised by multiple individuals from

267 the infected cohort (PA 168-187 and PA 651-670) showed a complete disparity in their

268 HLA binding affinities. Whilst PA 168-187 was not recognised by any of the transgenic  
269 lines and showed an exceptionally low binding affinity across all HLA-DR alleles tested,  
270 PA 651-670 showed strong-to-moderate binding across all HLA-DR alleles, and bound  
271 strongly to HLA-DQ8, which also correlated with a strong response seen in the  
272 corresponding transgenic line. Overall, we were not able to identify a propensity towards  
273 a strong HLA binding affinity in those epitopes that were a feature of the infected  
274 response. In contrast, all but one (PA 501-520) of the seven epitopes identified in more  
275 than 20% of the vaccinated cohort demonstrated high binding affinities for the HLA-DR  
276 or DQ alleles carried by those individuals. This suggests that the binding affinity may be  
277 a more important predictor of epitope hierarchy in the context of vaccination than  
278 infection.

280 **Table 1. The PA peptides, identified in transgenic mouse strains and human cohorts,**  
 281 **show relatively broad binding to common HLA-DR and HLA-DQ alleles.**

| PA peptide sequence                                 | HLA transgenic strain responding to epitope after PA immunisation | Human cohort responding to epitope (>20% cohort responding) | Relative binding of HLA class II |      |       |       |       |       |      |       |      |
|-----------------------------------------------------|-------------------------------------------------------------------|-------------------------------------------------------------|----------------------------------|------|-------|-------|-------|-------|------|-------|------|
|                                                     |                                                                   |                                                             | DR1                              | DR3  | DR4   | DR7   | DR11  | DR13  | DR15 | DQ6   | DQ8  |
| <sup>21</sup> GYFSDLNFPQAPMVVTSST <sup>40</sup>     | -                                                                 | Vaccinee, Infected                                          | 23                               | 60   | 0.3   | 22    | 53    | >1908 | 118  | ND    | ND   |
| <sup>31</sup> APMVVTSSTTGDLSPSEL <sup>50</sup>      | DR4                                                               | -                                                           | ND                               | ND   | ND    | ND    | ND    | ND    | ND   | ND    | ND   |
| <sup>41</sup> GDLSPSELENIPSENQYF <sup>60</sup>      | DR1                                                               | Infected                                                    | 3312                             | >728 | 46    | 424   | >1288 | >1288 | 134  | ND    | ND   |
| <sup>51</sup> ENIPSENQYFQSAIWSGFIK <sup>70</sup>    | DR4                                                               | Infected                                                    | 3                                | 600  | 1     | 2     | 2     | >2733 | 55   | ND    | ND   |
| <sup>61</sup> QSAIWSGFIKVKKSDEYTF <sup>80</sup>     | -                                                                 | Infected                                                    | 617                              | 12   | 650   | 89    | 14    | 4     | 1    | ND    | ND   |
| <sup>71</sup> VKKSDEYTFATSADNHVTW <sup>90</sup>     | DR4                                                               | Infected                                                    | 11                               | 8    | 1     | 2     | 118   | >2733 | 45   | ND    | ND   |
| <sup>91</sup> VDDQEVINKASNSNKIRLEK <sup>110</sup>   | -                                                                 | Infected                                                    | 1333                             | 283  | 992   | 36    | >1357 | 245   | 164  | ND    | ND   |
| <sup>121</sup> QRENPTKGLDFKLYWTD <sup>140</sup>     | DR4                                                               | Infected                                                    | >2563                            | 800  | 6     | 1549  | >1357 | >2733 | 119  | ND    | ND   |
| <sup>141</sup> NKKEVISSDNLQLPELKQKS <sup>160</sup>  | DQ8                                                               | Infected                                                    | 131                              | 26   | 48    | 28    | 849   | >2733 | 1    | >3054 | >166 |
| <sup>148</sup> SDNLQLPELKQKSSNSRKR <sup>167</sup>   | -                                                                 | Infected                                                    | ND                               | ND   | ND    | ND    | ND    | ND    | ND   | ND    | ND   |
| <sup>151</sup> LQLPELKQKSSNSRKRSTS <sup>170</sup>   | DQ8                                                               | Infected                                                    | >6667                            | >667 | >1788 | >1543 | 701   | 177   | >511 | >3054 | >166 |
| <sup>161</sup> SNSRKRSTSAGPTVDRDN <sup>180</sup>    | -                                                                 | Infected                                                    | >6667                            | >667 | >1788 | >1543 | >1336 | >1908 | >511 | ND    | ND   |
| <sup>168</sup> STSAGPTVDRDNDGIPDSL <sup>187</sup>   | -                                                                 | Infected                                                    | >6667                            | >667 | >1788 | >1543 | >1336 | >1908 | >511 | ND    | ND   |
| <sup>171</sup> AGPTVDRDNDGIPDSLE <sup>190</sup>     | -                                                                 | Infected                                                    | 149                              | 211  | 10    | 1167  | 7     | 51    | 95   | ND    | ND   |
| <sup>191</sup> GYTVDVKNKRTFLSPWISN <sup>210</sup>   | DQ8                                                               | Infected                                                    | 216                              | 0.2  | 190   | 11    | 231   | 0.5   | 15   | 2488  | >166 |
| <sup>201</sup> FLSPWISNIHEKGLTKYK <sup>220</sup>    | DQ8                                                               | -                                                           | 3162                             | >667 | 1400  | 873   | 327   | 306   | 14   | 3077  | >166 |
| <sup>221</sup> SSPEKWSTASDPYDFEKT <sup>240</sup>    | DR4                                                               | -                                                           | ND                               | ND   | ND    | ND    | ND    | ND    | ND   | ND    | ND   |
| <sup>241</sup> GRIDKNVSPEARHPLVAAY <sup>260</sup>   | DQ8                                                               | Vaccinee, Infected                                          | 2828                             | 15   | 55    | 833   | 567   | 9     | 9    | 899   | >166 |
| <sup>261</sup> IVHVDMENILSKNDQSTQ <sup>280</sup>    | -                                                                 | Infected                                                    | >6667                            | >667 | 167   | >1543 | >1336 | >1908 | >511 | ND    | ND   |
| <sup>281</sup> NTDSETRTISKNTSTSRHT <sup>300</sup>   | -                                                                 | Infected                                                    | >6667                            | 23   | 179   | 707   | 535   | 60    | >511 | ND    | ND   |
| <sup>301</sup> SEVHGNAEVHSAFFDIGGSV <sup>320</sup>  | DQ8                                                               | Vaccinee, Infected                                          | >6667                            | >667 | >1788 | 327   | >1336 | >1908 | >511 | 3     | 7    |
| <sup>321</sup> SAGFSNSNSSTVAIDHLSL <sup>340</sup>   | DR4                                                               | Infected                                                    | 279                              | 1    | 6     | 0.4   | 935   | >1908 | 95   | ND    | ND   |
| <sup>331</sup> VAIDHLSLGAERTWAETM <sup>350</sup>    | DR4, DQ8                                                          | Infected                                                    | 176                              | 0.3  | 10    | 11    | 30    | 4     | 120  | 1056  | 0.1  |
| <sup>361</sup> NANIRYVNTGTAPIYVLP <sup>380</sup>    | DR1                                                               | Vaccinee, Infected                                          | 15                               | >728 | 0.4   | 1     | 12    | >1288 | 3    | ND    | ND   |
| <sup>371</sup> TAPIYVLPPTSLVLGKNQ <sup>390</sup>    | DR1, DR4                                                          | Infected                                                    | 1                                | 12   | 2     | 0.4   | 78    | 300   | 6    | ND    | ND   |
| <sup>391</sup> LATIKAKENQLSQILAPNNY <sup>410</sup>  | -                                                                 | Infected                                                    | 89                               | 176  | 7     | 179   | 46    | 43    | 0.2  | ND    | ND   |
| <sup>421</sup> LNAQDDFSSPTITMNYNQFL <sup>440</sup>  | -                                                                 | Infected                                                    | >6667                            | >667 | 1265  | 22    | >1336 | >1908 | 77   | ND    | ND   |
| <sup>431</sup> PITMNYNQFLEKTKQLRL <sup>450</sup>    | -                                                                 | Vaccinee, Infected                                          | 15                               | 25   | 38    | 1     | 2     | 7     | 0.1  | ND    | ND   |
| <sup>451</sup> DTDQVYGNIAYNFENGRVR <sup>470</sup>   | DR4                                                               | Infected                                                    | 200                              | >667 | 293   | 30    | >1336 | >1908 | 2    | ND    | ND   |
| <sup>461</sup> TYNFENGRVVRVDTGSNWSEV <sup>480</sup> | DR4                                                               | -                                                           | ND                               | ND   | ND    | ND    | ND    | ND    | ND   | ND    | ND   |
| <sup>481</sup> LPOIQUETARIIFNGKDLN <sup>500</sup>   | DQ8                                                               | Infected                                                    | 2                                | 5    | 886   | 0.3   | 37    | 2     | 1    | 240   | 6    |
| <sup>491</sup> IIFNGKDLNVERRIA AVNP <sup>510</sup>  | DQ8                                                               | -                                                           | 3801                             | 31   | 327   | 267   | 0.1   | 7     | 95   | 693   | 75   |
| <sup>501</sup> VERRIA AVNPDPLETTKPD <sup>520</sup>  | DQ8                                                               | Vaccinee, Infected                                          | 721                              | 75   | 69    | 55    | >1288 | >1288 | 145  | 2506  | 29   |
| <sup>511</sup> SDPLETTKPDMTLKEALKIA <sup>530</sup>  | -                                                                 | Infected                                                    | 211                              | 10   | 1800  | 401   | 1000  | 10    | 37   | ND    | ND   |
| <sup>521</sup> MTLKEALKIAFGFNEPNGNL <sup>540</sup>  | -                                                                 | Infected                                                    | 1155                             | 18   | >1788 | 98    | 189   | 10    | 77   | ND    | ND   |
| <sup>531</sup> FGFNEPNGNLQYQKGDITEF <sup>550</sup>  | -                                                                 | Infected                                                    | >6667                            | >667 | 207   | >1543 | 1134  | >1908 | 63   | ND    | ND   |
| <sup>541</sup> QYQKGDITEFDFNFDDQTSQ <sup>560</sup>  | -                                                                 | Infected                                                    | >2563                            | 25   | 306   | >3365 | >1357 | >2733 | 44   | ND    | ND   |
| <sup>551</sup> DFNFDDQTSQNIKNQLAELN <sup>570</sup>  | -                                                                 | Infected                                                    | 249                              | 82   | 239   | 267   | >1336 | 250   | 200  | ND    | ND   |
| <sup>561</sup> NIKNQLAELNATNIYTVLDK <sup>580</sup>  | DR1                                                               | -                                                           | 2                                | >728 | 76    | 8     | 137   | 64    | 8    | ND    | ND   |
| <sup>571</sup> ATNIYTVLDKIKLNAMN <sup>590</sup>     | -                                                                 | Infected                                                    | 31                               | 5    | 278   | 19    | 0.5   | 3     | 11   | ND    | ND   |
| <sup>581</sup> IKLNAMNILIRKRFHYDR <sup>600</sup>    | -                                                                 | Infected                                                    | 2160                             | 0.1  | 500   | 378   | 6     | 0     | 4    | ND    | ND   |
| <sup>591</sup> IRDKRFHYDRNNI AVGADES <sup>610</sup> | DR4, DQ8                                                          | -                                                           | 25                               | 1    | 0.2   | 4     | 4     | 25    | 2    | 1132  | 0.5  |
| <sup>601</sup> NNI AVGADES VVKEAHREV <sup>620</sup> | DR4, DQ8                                                          | -                                                           | 4989                             | 10   | 1183  | 750   | 732   | 16    | 122  | 2191  | 6    |
| <sup>621</sup> NSSTEGLLNIDKIRKILS <sup>640</sup>    | -                                                                 | Infected                                                    | 2236                             | 1    | 414   | 80    | 53    | 3     | 77   | ND    | ND   |
| <sup>631</sup> IDKIRKILSGYVEIEDTE <sup>650</sup>    | DR1                                                               | Infected                                                    | 5                                | 775  | 510   | 1     | 72    | 1026  | 0.3  | ND    | ND   |
| <sup>641</sup> GYVEIEDTEGLKEVINDRY <sup>660</sup>   | DR4                                                               | -                                                           | 3162                             | 82   | 21    | 65    | 433   | 1333  | 0.1  | ND    | ND   |
| <sup>651</sup> GLKEVINDRYDMLNISSLRQ <sup>670</sup>  | DQ8                                                               | Infected                                                    | 7                                | 10   | 6     | 22    | 46    | 15    | 6    | >3054 | 1    |
| <sup>661</sup> DMLNISSLRQDGKTFIDFK <sup>680</sup>   | -                                                                 | Infected                                                    | 200                              | 2    | 30    | 27    | 33    | 4     | 27   | ND    | ND   |



|                                                   |          |                    |       |      |       |     |     |     |    |       |      |
|---------------------------------------------------|----------|--------------------|-------|------|-------|-----|-----|-----|----|-------|------|
| <sup>671</sup> DGKTFIDFKKYNDKLPYIS <sup>690</sup> | -        | Vaccinee, Infected | 2494  | 100  | >1788 | 138 | 14  | 25  | 4  | ND    | ND   |
| <sup>681</sup> YNDKLPYISNPYKVNVA <sup>700</sup>   | DR1, DR4 | Infected           | 1     | 4    | 1     | 2   | 2   | 30  | 1  | ND    | ND   |
| <sup>691</sup> NPNYKVNVAVTKEIINP <sup>710</sup>   | -        | Infected           | 50    | 3    | 75    | 0.3 | 13  | 6   | 10 | ND    | ND   |
| <sup>711</sup> SENGDTSTNGIKKILIFS <sup>730</sup>  | DR4, DQ8 | -                  | >6667 | >667 | >1788 | 133 | 3   | 217 | 3  | >3054 | >166 |
| <sup>716</sup> STNGIKKILIFS <sup>735</sup>        | DQ8      | -                  | 183   | 1    | 849   | 35  | 0.4 | 0.4 | 1  | >3054 | >166 |

282

283 Binding affinities are expressed as relative values which were calculated as the ratio of  
 284 the PA peptides IC50 to the IC50 of a reference peptide chosen as a high binder for each  
 285 allele. High affinity values were interpreted as < 100. Means were calculated from at least  
 286 three independent experiments. ND = Not Done.

DRAFT COPY

## 288 **Discussion**

289 Human exposure to anthrax spores continues to be of considerable concern in diverse  
290 spheres of clinical infectious disease; most commonly, exposure may occur naturally,  
291 either after ingestion of infected animals or through contact with infected animal  
292 products. Other routes of exposure could occur through deliberate release, acts of  
293 bioterrorism, or injection of contaminated drugs by intravenous drug users [3, 27, 30]; in  
294 these contexts, especially the threat of bioterrorist use, there has long been a perceived  
295 need to have an effective anthrax vaccination programme available. Three major vaccines  
296 have been in use in various parts of the world since the Cold War, with various  
297 recombinant subunit vaccine candidates in trial for rollout [31, 32]. Interestingly  
298 however, compared to many other bacterial pathogens, the immunology and  
299 immunogenetics underpinning any clear understanding of correlates of protection (CoP)  
300 are poorly delineated for anthrax [33]. Although vaccine development has focused largely  
301 on the endpoint of PA-targeted neutralising antibody, this alone is unlikely to confer  
302 sterilising immunity. At a general level, the CoP for effective AVA-vaccine-induced  
303 protection of macaques from anthrax challenge are IgG titre and IFN $\gamma$ <sup>+</sup> T cell frequency  
304 against PA [34]. Protection conferred by anthrax spores is entirely dependent on CD4<sup>+</sup> T  
305 cells [35].

306

307 In seeking an improved understanding of the interaction between *B. anthracis* and  
308 protection by the human immune system, a key question has been the impact of  
309 immunogenetic heterogeneity at the population level [36]; work in mouse models has  
310 suggested that, as expected, both MHC and non-MHC polymorphisms are influencing

311 these factors [37]. With respect to human vaccination, there is evidence of reduced  
312 immune responsiveness to PA in individuals with the DRB1\*1501/DQB1\*0602  
313 haplotype [38]. In light of the importance of anti-PA immunity for protection and the  
314 relatively high frequency of this haplotype in many human populations, there is cause for  
315 concern in relation to vaccine efficacy and vaccine confidence. The situation is  
316 reminiscent of hepatitis B virus and MMR vaccinations, both of which demonstrate the  
317 profound influence of HLA polymorphism [39, 40].

318  
319 Our aim here has been to shed light on the role of HLA class II alleles in PA epitope  
320 presentation to the immune system and thus on disease outcome after anthrax challenge.  
321 A key experiment in this regard was to compare the impact of STI challenge on survival  
322 and the control of bacterial load in mice, all on a C57BL/6 background and lacking  
323 expression of endogenous murine MHC class II heterodimers but differing in expression  
324 of specific HLA-DR or HLA-DQ alleles. The background C57BL/6 strain is considered  
325 one that mounts a low antibody response to anthrax PA and LF [37]. We found that HLA-  
326 DR15 transgenics (expressing the HLA-DRB1\*1501 allele) were the most susceptible to  
327 challenge, echoing the results of human AVA HLA-DRB1\*1501<sup>+</sup> vaccinees [38]. It is  
328 particularly noteworthy that the effects of HLA class II alleles must be differentially  
329 effective in CD4<sup>+</sup> T cell-mediated control of bacterial dissemination during the first 4 to  
330 6 days after challenge, the very earliest days of detectable priming of an adaptive immune  
331 response. Nuanced differences in the potency and frequency of the initial CD4<sup>+</sup> T cell  
332 responses have the potential to favourably impact survival by driving cellular responses  
333 to intracellular infection and generation of an initial neutralising antibody response. Such

334 differences in susceptibility due to HLA polymorphisms are unlikely to have imposed  
335 evolutionary selection pressure in anthrax-exposed human populations. The pathogen is  
336 rarely transmitted from human-to-human, outbreaks tend to be of a limited nature (such  
337 as a local community consuming the same contaminated livestock), and most cases are  
338 not fatal. The greater concern relates to potential gaps in the efficacy of large-scale  
339 vaccination programmes for biodefense purposes, such as in the US military.

340  
341 We looked at mechanisms underpinning HLA differences in susceptibility, starting with  
342 mapping of CD4+ T cell epitopes from PA. Our key findings were that natural infection  
343 elicits a considerably broader CD4+ epitope response than AVP vaccination and at least  
344 in the setting of natural infection, this is a very epitope-rich sequence, with epitopes  
345 spanning the entire length of the protein. It is well-established that in communities where  
346 environmental exposure to anthrax is relatively common, such as among goat-herders,  
347 symptomatic exposure confers lifelong protection from re-infection [25]. Differences in  
348 antigen processing and generation of epitopes for HLA class II binding between the AVP  
349 subunit vaccine components and live infection of APC might in some respects have been  
350 predictable, except that earlier studies of dendritic cells treated with lethal toxin showed a  
351 complete loss of the ability to effectively stimulate peptide-specific CD4+ T cells [41].  
352 The PA sequence contains a number of regions with potential broad-ranging  
353 immunogenicity in terms of high-affinity binding to the majority of HLA class II alleles  
354 tested: 5 of the PA peptides analysed are relatively unusual in their capacity to bind very  
355 diverse HLA class II heterodimers at high affinity; PA191-210, 331-350, 481-500, 591-  
356 610 and 711-730. The 191-200 PA epitope overlaps one that we have previously

357 identified at the CD4+ T cell level as being strongly recognised in the memory T cell  
358 response of a 60-year old intravenous drug-user who survived injection of anthrax-  
359 contaminated heroin [27]. This collection of epitopes would be excellent candidates for a  
360 highly immunogenic, widely applicable, epitope-string vaccine. Importantly, the fact that  
361 all bind HLA-DRB1\*1501 with high or very high affinity makes it likely that the ‘low-  
362 responder’ status of HLA-DRB1\*1501 vaccinees would be overcome by an approach  
363 focused on these epitopes. However, HLA class II-related differences in susceptibility to  
364 anthrax challenge cannot be a simple question of relative availability of high-affinity  
365 HLA class II-binding PA epitopes to activate the CD4+ T cell repertoire: the most  
366 susceptible HLA allele that we identified, HLA-DRB1\*1501, can present at least as many  
367 PA epitopes as can the least susceptible allele, HLA-DRB1\*0101. It is also important to  
368 stress that, while the HLA transgenic mice used to define immunodominant PA epitopes  
369 offer a useful reductionist system, the immune responses seen in this system may not  
370 fully recapitulate the effect of the individual HLA polymorphisms in a complete immune  
371 system. This may give a partial explanation for the divergence in epitopes identified in  
372 the HLA transgenics and those found in the human cohorts.

373

374 In summary, we draw two important conclusions from this comprehensive analysis of T  
375 cell recognition of anthrax PA. The first is that PA is an unexpectedly epitope-rich  
376 antigen, whether considered from a perspective of HLA class II binding or of CD4+ T  
377 cell recognition. The second key point, and one that offers an important note of caution to  
378 vaccinologists and to those planning biodefense strategies, is that there are likely to be  
379 major differences in both vaccine efficacy and anthrax severity imposed by HLA

380 polymorphism within the population. These factors underscore the importance of  
381 considering immunological and vaccination strategies that can overcome such  
382 differences.

383

## 384 **Materials and Methods**

### 385 *Ethics Statement*

386 Human blood samples from Kayseri (Turkey) were obtained with full review and  
387 approval by The Ethics Committee of the Faculty of Medicine, Erciyes University.  
388 Human vaccinees based at DSTL, Porton Down, participated in the context of a study  
389 protocol approved by the CBD IEC (Chemical and Biological Defence Independent  
390 Ethics Committee). Written informed consent was obtained from all human volunteers.  
391 All mouse experiments were performed under the control of UK Home Office legislation  
392 in accordance with the terms of the Project License (70/5994) granted for this work under  
393 the Animals (Scientific Procedures) Act 1986, having also received formal approval of  
394 the document through the Imperial College Ethical Review Process (ERP) Committee.

395

### 396 *HLA class II transgenic mice*

397 HLA class II transgenic mice carrying genomic constructs for HLA-DRA1\*0101/HLA-  
398 DRB1\*0101 (HLA-DR1), HLA-DRA1\*0101/HLA-DRB1\*0401 (HLA-DR4), HLA-  
399 DRA1\*0101/HLA-DRB1\*1501 (HLA-DR15) and HLA-DQA1\*0301-DQB1\*0302  
400 (HLA-DQ8), crossed for more than six generations to C57BL/6 H2-Ab<sup>00</sup> mice, were as

401 described previously [42-46]. All experiments were performed in accordance with the  
402 Animals (Scientific Procedures) Act 1986 and were approved by local ethical review  
403 panel.

404

#### 405 ***Live B. anthracis challenge***

406 Preliminary data indicated that there was a divergence in the susceptibility of mouse  
407 strains to anthrax challenge. Therefore, naïve mice were challenged with *B. anthracis* STI  
408 strain by the intraperitoneal route at one of two dose levels: 11 HLA-DR1 and 10 HLA-  
409 DQ8 mice were challenged with  $10^6$  colony forming units (CFU) while 9 HLA-DR15, 10  
410 HLA-DR4, 8 HLA-DQ6 and 10 C57Bl6 were challenged with  $10^4$  CFU per mouse. The  
411 animals were monitored for 20 days post-infection, after which all survivors were  
412 sacrificed and their spleens were removed and homogenised in 1 mL of PBS before  
413 plating out onto L-agar plates. Colonies were counted after 24 hours of culture at 37°C,  
414 and the mean bacterial count per spleen was determined.

415

#### 416 ***Expression and purification of PA antigens***

417 Good Manufacturing Practice grade rPA was provided by Avecia Vaccines (Billingham,  
418 UK) and had endotoxin levels of < 1 EU/mg. Individual domains of PA and peptides  
419 were expressed in *E. coli* and purified as previously described [47]. All proteins and  
420 peptides were resuspended in DMSO at 25 mg/mL.

421

## 422 ***PA epitope mapping in transgenic mice***

423 Mice were immunised in one hind footpad with 50  $\mu$ L of 12.5  $\mu$ g recombinant full-length  
424 PA, PA peptides, or a control of PBS, emulsified in an equal volume of TiterMax Gold  
425 (Sigma-Aldrich, USA) by syringe extrusion. After 10 days, immunised draining popliteal  
426 lymph nodes were removed and disaggregated into single-cell suspensions by filtration  
427 through 0.7  $\mu$ m cell strainers. Lymph node cell responses were recalled *in vitro* with 25  
428  $\mu$ g/mL of either rPA, truncated PA domains comprising the PA protein, or the  
429 overlapping 20-mer peptides covering the full-length PA sequence. This produced a  
430 CD4<sup>+</sup> T cell epitope map of the entire PA protein sequence. To confirm the  
431 immunodominant epitopes identified by this large-scale mapping, mice were then  
432 immunised subcutaneously with 12.5  $\mu$ g of the individual PA peptides in TitreMax  
433 adjuvant. After 10 days the lymph node cells were challenged *in vitro* with 25  $\mu$ g/mL of  
434 the recombinant full-length PA and the immunising and two flanking PA peptides.

435

436 Quantification of murine antigen-specific INF $\gamma$  levels was carried out by ELISpot  
437 (Diaclone, USA) analysis of T cell populations directly *ex vivo*. Ninety-six-well  
438 hydrophobic polyvinylidene difluoride membrane-bottomed plates (MAIP S 45;  
439 Millipore, USA) were pre-wetted with 70% ethanol. The plates were washed twice with  
440 PBS, then coated with anti-INF $\gamma$  monoclonal antibody at 4°C overnight. After blocking  
441 with 2% skimmed milk, plates were washed with PBS, and 100  $\mu$ L/well of antigen was  
442 added in triplicate to appropriate wells. For each assay, a medium-only negative control  
443 and a positive control of staphylococcal enterotoxin B (SEB 25 ng/mL) were included.  
444 Wells were seeded with 2 x 10<sup>6</sup> cells/mL in HL-1 medium (supplemented with 1% L-



445 glutamine, 1% penicillin/streptomycin, and 2.5%  $\beta$ -mercaptoethanol) and plates were  
446 incubated for 72 hours at 37 °C with 5% CO<sub>2</sub>. The plate contents were then discarded and  
447 plates were incubated with PBS/Tween 20 (0.1%) for 10 minutes at 4°C. Plates were then  
448 washed twice with PBS/Tween 20 (0.1%) and incubated with biotinylated anti-INF $\gamma$   
449 monoclonal antibody. Plates were again washed twice with PBS/Tween 20 (0.1%), and  
450 then incubated with streptavidin-alkaline phosphatase conjugate. After a wash with  
451 PBS/Tween 20 (0.1%), plates were treated with 5-bromo-4-chloro-3-indolyl phosphate  
452 and nitro blue tetrazolium (BCIP/NBT) and spot formation was monitored visually. The  
453 plate contents were then discarded and plates were washed with water, then air-dried and  
454 incubated overnight at 4°C to enhance spot clarity. Spots were counted using an  
455 automated ELISpot reader (AID), and results expressed as delta spot-forming cells per  
456 10<sup>6</sup> cells ( $\Delta$ SFC/10<sup>6</sup> which is calculated as SFC/10<sup>6</sup> of stimulated cells minus SFC/10<sup>6</sup> of  
457 negative control cells). The results were considered positive if the  $\Delta$ SFC/10<sup>6</sup> was more  
458 than two standard deviations above the negative control.

459

460 For assessment of peptide-specific T cell proliferation, murine lymphocytes were  
461 resuspended at 3.5x10<sup>6</sup> cells/mL in supplemented HL-1 media (Lonza, UK) (1% L-  
462 glutamine, 1% penicillin/streptomycin, 2.5%  $\beta$ -mercaptoethanol) and 100  $\mu$ L/well was  
463 plated out in triplicate in 96-well Costar tissue culture plates (Corning Incorporated,  
464 USA). The cells were stimulated with 100  $\mu$ L/well of appropriate antigen, positive  
465 controls of 5  $\mu$ g/mL Con A (Sigma-Aldrich, USA) or 25 ng/mL of SEB (Sigma-Aldrich,  
466 USA) or negative controls of medium with cells. Plates were incubated at 37°C with 5%  
467 CO<sub>2</sub> for 5 days. Eight hours before harvesting, 1  $\mu$ Ci/well of [<sup>3</sup>H]-thymidine (GE

468 Healthcare, UK) was added. The cells were harvested onto fiberglass filtermats  
469 (PerkinElmer, USA) using a Harvester 96 cell harvester (Tomtec, USA) and counted on a  
470 Wallac Betaplate scintillation counter (EG&G Instruments, Netherlands). Results were  
471 expressed as either delta counts per minute ( $\Delta$ CPM which is calculated as CPM of  
472 stimulated cells minus CPM of negative control cells) or stimulation index (SI which is  
473 calculated as CPM of stimulated cells divided by CPM of negative control cells). An SI  
474 of  $\geq 2.5$  was considered to indicate a positive proliferation response.

475

#### 476 ***PA epitope mapping with human donor PBMC samples***

477 Lymphocytes were isolated from human peripheral blood samples and stimulated as  
478 described previously [25]. In brief, sodium-heparinised blood was collected with full  
479 informed consent (Erciyes University Ethical Committee) from nine Turkish patients  
480 treated for cutaneous anthrax infection within the last eight years and 10 volunteers  
481 routinely vaccinated every 12 months for a minimum of five years with the UK AVP  
482 vaccine (UK Department of Health under approval by the Convention on Biological  
483 Diversity Independent Ethics Committee for the UK Ministry of Defence). Peripheral  
484 blood mononuclear cells (PBMC) were isolated from the blood by centrifugation at 800g  
485 for 30 minutes in Accuspin tubes (Sigma, UK) cells were then removed from the  
486 interface and washed twice in AIM-V serum free media. Cells were counted for viability  
487 and resuspended at  $2 \times 10^6$  cells/mL.

488

489 Human T cell  $\text{INF}\gamma$  levels were quantified by ELISpot (Diaclone, France) as previously  
490 described [25]. In brief, the peptide library was prepared in a matrix comprising six

491 peptides per pool, so that each peptide occurred in two pools but no peptides occurred  
492 together in multiple pools. This allowed the determination of responses to individual  
493 peptides. The in-well concentration of each peptide was 25 µg/mL and total peptide  
494 concentration per well was 150 µg/mL. After addition of antigen to the wells the plates  
495 were frozen at -80 °C until use. Wells were seeded with human PBMCs at  $2 \times 10^5$   
496 cells/well (range:  $1.6 \times 10^5$  to  $2.1 \times 10^5$  cells/well) in AIM-V media (Gibco, UK) and  
497 plates were incubated for 72 hours at 37 °C with 5% CO<sub>2</sub>. The plate contents were then  
498 discarded and plates were washed with PBS-Tween 20 (0.1%) and incubated with  
499 biotinylated anti-IFN $\gamma$ , then washed again before streptavidin-alkaline-phosphatase  
500 conjugate was added. After a final wash, plates were developed by addition of  
501 BCIP/NBT. Spots were counted using an automated ELISpot reader (AID), and results  
502 were expressed as  $\Delta$ SFC/10<sup>6</sup>. The results were considered positive if the  $\Delta$ SFC/10<sup>6</sup> was  
503 more than two standard deviations above the negative control and  $\geq 50$  spots.

504

### 505 ***HLA-peptide binding assay***

506 Competitive ELISAs were used to determine the relative binding affinity of PA peptides  
507 to HLA-DR molecules as previously described [48, 49]. Briefly, the HLA-DR molecules  
508 were immunopurified from homozygous EBV-transformed lymphoblastoid B cell lines  
509 by affinity chromatography. The HLA-DR molecules were diluted in HLA binding buffer  
510 and incubated for 24 to 72 hours with an appropriate biotinylated reporter peptide, and a  
511 serial dilution of the competitor PA peptides. Controls of unlabelled reporter peptides  
512 were used as reference peptides to assess the validity of each experiment. 50 µL of HLA  
513 binding neutralisation buffer was added to each well and the resulting supernatants were

514 incubated for 2 hours at room temperature in ELISA plates (Nunc, Denmark) previously  
515 coated with 10 µg/mL of the monoclonal antibody L243. Bound biotinylated peptide was  
516 detected by addition of streptavidin-alkaline phosphatase conjugate (GE Healthcare,  
517 France) and 4-methylumbelliferyl phosphate substrate (Sigma-Aldrich, France). Emitted  
518 fluorescence was measured at 450 nm post-excitation at 365 nM on a SpectraMax Gemini  
519 fluorometer (Molecular Devices, France). The PA peptide concentration that prevented  
520 binding of 50% of the labeled peptide (IC<sub>50</sub>) was evaluated, and data expressed as relative  
521 binding affinity (ratio of IC<sub>50</sub> of the PA competitor peptide to the IC<sub>50</sub> of the reference  
522 peptide that binds strongly to the HLA-DR molecule). Sequences of the reference  
523 peptides and their IC<sub>50</sub> values were as follows: HA 306–318 (PKYVKQNTLKLAT) for  
524 DRB1\*0101 (4 nM), DRB1\*0401 (8 nM), DRB1\*1101 (7 nM), YKL  
525 (AAAYAAKAAALAA) for DRB1\*0701 (3 nM), A3 152–166  
526 (EAEQLRAYLDGTGVE) for DRB1\*1501 (48 nM), MT 2–16 (AKTIAYDEEARRGLE)  
527 for DRB1\*0301 (100 nM), B1 21–36 (TERVRLVTRHIYNREE) for DRB1\*1301 (37  
528 nM), DQB45–57 (ADVEVYRAVTPLGPPD) for DQ8 (100 nM) and INS1–15A  
529 (FVNQHLAAGSHLVEAL) for DQ6 (100nM). Strong binding affinity was defined in this  
530 study as a relative activity <100.

531

## 532 **Author Contributions**

533 Conceived and designed the experiments: SA RJI KKC EDW LB SS JHR BM RJB  
534 DMA. Performed the experiments: SA RJI KKC HD EDW JHR BM SJM. Analysed the  
535 data: SA RJI KKC JHR BM. Contributed reagents/materials/analysis tools: MD GM YO  
536 LB SJM TG HD. Wrote the paper: SA RJI RJB DMA. All authors listed have made a

537 substantial, direct, and intellectual contribution to the manuscript and approved it for  
538 publication.

539

## 540 **Conflict of Interest Statement**

541 DMA has received payment in a role as scientific consultant to the anthrax vaccine  
542 programme at Pfenex Inc. San Diego. The authors declare that this relationship had no  
543 role in the study design, data collection and analysis, decision to publish, or preparation  
544 of the manuscript.

## 545 **Acknowledgements**

546 Julie A. Musson is thanked for assistance with ELISpot assays.

547

## 548 **References**

- 549 1. Goel AK. Anthrax: A disease of biowarfare and public health importance. *World*  
550 *J Clin Cases*. 2015;3(1):20-33. Epub 2015/01/23. doi: 10.12998/wjcc.v3.i1.20. PubMed  
551 PMID: 25610847; PubMed Central PMCID: PMC4295216.
- 552 2. Dixon TC, Meselson M, Guillemin J, Hanna PC. Anthrax. *N Engl J Med*.  
553 1999;341(11):815-26. Epub 1999/09/09. doi: 10.1056/NEJM199909093411107. PubMed  
554 PMID: 10477781.
- 555 3. Green MS, LeDuc J, Cohen D, Franz DR. Confronting the threat of bioterrorism:  
556 realities, challenges, and defensive strategies. *Lancet Infect Dis*. 2019;19(1):e2-e13. Epub  
557 2018/10/21. doi: 10.1016/S1473-3099(18)30298-6. PubMed PMID: 30340981.
- 558 4. Abbara A, Brooks T, Taylor GP, Nolan M, Donaldson H, Manikon M, et al.  
559 Lessons for control of heroin-associated anthrax in Europe from 2009-2010 outbreak case  
560 studies, London, UK. *Emerg Infect Dis*. 2014;20(7):1115-22. Epub 2014/06/25. doi:  
561 10.3201/eid2007.131764. PubMed PMID: 24959910; PubMed Central PMCID:  
562 PMC4073855.
- 563 5. Revich BA, Podolnaya MA. Thawing of permafrost may disturb historic cattle  
564 burial grounds in East Siberia. *Glob Health Action*. 2011;4. Epub 2011/11/25. doi:  
565 10.3402/gha.v4i0.8482. PubMed PMID: 22114567; PubMed Central PMCID:  
566 PMC3222928.
- 567 6. Baillie LW, Fowler K, Turnbull PC. Human immune responses to the UK human  
568 anthrax vaccine. *J Appl Microbiol*. 1999;87(2):306-8. Epub 1999/09/04. PubMed PMID:  
569 10475977.

- 570 7. Chitlaru T, Altboum Z, Reuveny S, Shafferman A. Progress and novel strategies  
571 in vaccine development and treatment of anthrax. *Immunol Rev.* 2011;239(1):221-36.  
572 Epub 2011/01/05. doi: 10.1111/j.1600-065X.2010.00969.x. PubMed PMID: 21198675.
- 573 8. Enstone JE, Wale MC, Nguyen-Van-Tam JS, Pearson JC. Adverse medical events  
574 in British service personnel following anthrax vaccination. *Vaccine.* 2003;21(13-  
575 14):1348-54. Epub 2003/03/05. PubMed PMID: 12615429.
- 576 9. Brey RN. Molecular basis for improved anthrax vaccines. *Adv Drug Deliv Rev.*  
577 2005;57(9):1266-92. Epub 2005/06/07. doi: 10.1016/j.addr.2005.01.028. PubMed PMID:  
578 15935874.
- 579 10. Hopkins RJ, Kalsi G, Montalvo-Lugo VM, Sharma M, Wu Y, Muse DD, et al.  
580 Randomized, double-blind, active-controlled study evaluating the safety and  
581 immunogenicity of three vaccination schedules and two dose levels of AV7909 vaccine  
582 for anthrax post-exposure prophylaxis in healthy adults. *Vaccine.* 2016;34(18):2096-105.  
583 Epub 2016/03/17. doi: 10.1016/j.vaccine.2016.03.006. PubMed PMID: 26979136;  
584 PubMed Central PMCID: PMC4839983.
- 585 11. Baillie LW. Past, imminent and future human medical countermeasures for  
586 anthrax. *J Appl Microbiol.* 2006;101(3):594-606. Epub 2006/08/16. doi: 10.1111/j.1365-  
587 2672.2006.03112.x. PubMed PMID: 16907809.
- 588 12. Brown BK, Cox J, Gillis A, VanCott TC, Marovich M, Milazzo M, et al. Phase I  
589 study of safety and immunogenicity of an Escherichia coli-derived recombinant  
590 protective antigen (rPA) vaccine to prevent anthrax in adults. *PLoS One.*  
591 2010;5(11):e13849. Epub 2010/11/17. doi: 10.1371/journal.pone.0013849. PubMed  
592 PMID: 21079762; PubMed Central PMCID: PMC2974626.
- 593 13. Campbell JD, Clement KH, Wasserman SS, Donegan S, Chrisley L, Kotloff KL.  
594 Safety, reactogenicity and immunogenicity of a recombinant protective antigen anthrax  
595 vaccine given to healthy adults. *Hum Vaccin.* 2007;3(5):205-11. Epub 2007/09/21.  
596 PubMed PMID: 17881903.
- 597 14. Gorse GJ, Keitel W, Keyserling H, Taylor DN, Lock M, Alves K, et al.  
598 Immunogenicity and tolerance of ascending doses of a recombinant protective antigen  
599 (rPA102) anthrax vaccine: a randomized, double-blinded, controlled, multicenter trial.  
600 *Vaccine.* 2006;24(33-34):5950-9. Epub 2006/06/27. doi: 10.1016/j.vaccine.2006.05.044.  
601 PubMed PMID: 16797805.
- 602 15. Hewetson JF, Little SF, Ivins BE, Johnson WM, Pittman PR, Brown JE, et al. An  
603 in vivo passive protection assay for the evaluation of immunity in AVA-vaccinated  
604 individuals. *Vaccine.* 2008;26(33):4262-6. Epub 2008/07/01. doi:  
605 10.1016/j.vaccine.2008.05.068. PubMed PMID: 18586363.
- 606 16. Smith K, Crowe SR, Garman L, Guthridge CJ, Muther JJ, McKee E, et al. Human  
607 monoclonal antibodies generated following vaccination with AVA provide neutralization  
608 by blocking furin cleavage but not by preventing oligomerization. *Vaccine.*  
609 2012;30(28):4276-83. Epub 2012/03/20. doi: 10.1016/j.vaccine.2012.03.002. PubMed  
610 PMID: 22425791; PubMed Central PMCID: PMC3367042.
- 611 17. Reuveny S, White MD, Adar YY, Kafri Y, Altboum Z, Gozes Y, et al. Search for  
612 correlates of protective immunity conferred by anthrax vaccine. *Infect Immun.*  
613 2001;69(5):2888-93. Epub 2001/04/09. doi: 10.1128/IAI.69.5.2888-2893.2001. PubMed  
614 PMID: 11292703; PubMed Central PMCID: PMC98239.

- 615 18. Crowe SR, Ash LL, Engler RJ, Ballard JD, Harley JB, Farris AD, et al. Select  
616 human anthrax protective antigen epitope-specific antibodies provide protection from  
617 lethal toxin challenge. *J Infect Dis.* 2010;202(2):251-60. Epub 2010/06/11. doi:  
618 10.1086/653495. PubMed PMID: 20533877; PubMed Central PMCID:  
619 PMCPMC2891133.
- 620 19. Quinn CP, Sabourin CL, Niemuth NA, Li H, Semenova VA, Rudge TL, et al. A  
621 three-dose intramuscular injection schedule of anthrax vaccine adsorbed generates  
622 sustained humoral and cellular immune responses to protective antigen and provides  
623 long-term protection against inhalation anthrax in rhesus macaques. *Clin Vaccine*  
624 *Immunol.* 2012;19(11):1730-45. Epub 2012/08/31. doi: 10.1128/CVI.00324-12. PubMed  
625 PMID: 22933399; PubMed Central PMCID: PMCPMC3491539.
- 626 20. McBride BW, Mogg A, Telfer JL, Lever MS, Miller J, Turnbull PC, et al.  
627 Protective efficacy of a recombinant protective antigen against *Bacillus anthracis*  
628 challenge and assessment of immunological markers. *Vaccine.* 1998;16(8):810-7. Epub  
629 1998/06/17. PubMed PMID: 9627938.
- 630 21. Williamson ED, Beedham RJ, Bennett AM, Perkins SD, Miller J, Baillie LW.  
631 Presentation of protective antigen to the mouse immune system: immune sequelae. *J Appl*  
632 *Microbiol.* 1999;87(2):315-7. Epub 1999/09/04. PubMed PMID: 10475979.
- 633 22. Zhang Y, Qiu J, Zhou Y, Farhangfar F, Hester J, Lin AY, et al. Plasmid-based  
634 vaccination with candidate anthrax vaccine antigens induces durable type 1 and type 2 T-  
635 helper immune responses. *Vaccine.* 2008;26(5):614-22. Epub 2008/01/02. doi:  
636 10.1016/j.vaccine.2007.11.072. PubMed PMID: 18166249.
- 637 23. Doolan DL, Freilich DA, Brice GT, Burgess TH, Berzins MP, Bull RL, et al. The  
638 US capitol bioterrorism anthrax exposures: clinical epidemiological and immunological  
639 characteristics. *J Infect Dis.* 2007;195(2):174-84. Epub 2006/12/28. doi: 10.1086/510312.  
640 PubMed PMID: 17191162.
- 641 24. Glomski IJ, Corre JP, Mock M, Goossens PL. Cutting Edge: IFN-gamma-  
642 producing CD4 T lymphocytes mediate spore-induced immunity to capsulated *Bacillus*  
643 *anthracis*. *J Immunol.* 2007;178(5):2646-50. Epub 2007/02/22. PubMed PMID:  
644 17312104.
- 645 25. Ingram RJ, Metan G, Maillere B, Doganay M, Ozkul Y, Kim LU, et al. Natural  
646 exposure to cutaneous anthrax gives long-lasting T cell immunity encompassing  
647 infection-specific epitopes. *J Immunol.* 2010;184(7):3814-21. Epub 2010/03/09. doi:  
648 10.4049/jimmunol.0901581. PubMed PMID: 20208010.
- 649 26. Ascough S, Ingram RJ, Chu KK, Reynolds CJ, Musson JA, Doganay M, et al.  
650 Anthrax lethal factor as an immune target in humans and transgenic mice and the impact  
651 of HLA polymorphism on CD4+ T cell immunity. *PLoS Pathog.* 2014;10(5):e1004085.  
652 Epub 2014/05/03. doi: 10.1371/journal.ppat.1004085. PubMed PMID: 24788397;  
653 PubMed Central PMCID: PMCPMC4006929.
- 654 27. Ascough S, Ingram RJ, Abarra A, Holmes AJ, Maillere B, Altmann DM, et al.  
655 Injectional anthrax infection due to heroin use induces strong immunological memory. *J*  
656 *Infect.* 2014;68(2):200-3. Epub 2014/02/12. doi: 10.1016/j.jinf.2013.10.007. PubMed  
657 PMID: 24513100; PubMed Central PMCID: PMCPMC4150029.
- 658 28. Ascough S, Ingram RJ, Chu KK, Musson JA, Moore SJ, Gallagher T, et al. CD4+  
659 T Cells Targeting Dominant and Cryptic Epitopes from *Bacillus anthracis* Lethal Factor.

- 660 Front Microbiol. 2015;6:1506. Epub 2016/01/19. doi: 10.3389/fmicb.2015.01506.  
661 PubMed PMID: 26779161; PubMed Central PMCID: PMC4700811.
- 662 29. Ingram RJ, Ascough S, Reynolds CJ, Metan G, Doganay M, Baillie L, et al.  
663 Natural cutaneous anthrax infection, but not vaccination, induces a CD4(+) T cell  
664 response involving diverse cytokines. *Cell Biosci.* 2015;5:20. Epub 2015/06/16. doi:  
665 10.1186/s13578-015-0011-4. PubMed PMID: 26075052; PubMed Central PMCID:  
666 PMC4464127.
- 667 30. Ascough S, Altmann DM. Anthrax in injecting drug users: the need for increased  
668 vigilance in the clinic. *Expert Rev Anti Infect Ther.* 2015;13(6):681-4. Epub 2015/04/02.  
669 doi: 10.1586/14787210.2015.1032255. PubMed PMID: 25831413.
- 670 31. Laws TR, Kuchuloria T, Chitadze N, Little SF, Webster WM, Debes AK, et al. A  
671 Comparison of the Adaptive Immune Response between Recovered Anthrax Patients and  
672 Individuals Receiving Three Different Anthrax Vaccines. *PLoS One.*  
673 2016;11(3):e0148713. Epub 2016/03/24. doi: 10.1371/journal.pone.0148713. PubMed  
674 PMID: 27007118; PubMed Central PMCID: PMC4805272.
- 675 32. Altmann DM. Host immunity to *Bacillus anthracis* lethal factor and other  
676 immunogens: implications for vaccine design. *Expert Rev Vaccines.* 2015;14(3):429-34.  
677 Epub 2014/11/18. doi: 10.1586/14760584.2015.981533. PubMed PMID: 25400140.
- 678 33. Williamson ED, Hodgson I, Walker NJ, Topping AW, Duchars MG, Mott JM, et  
679 al. Immunogenicity of recombinant protective antigen and efficacy against aerosol  
680 challenge with anthrax. *Infect Immun.* 2005;73(9):5978-87. Epub 2005/08/23. doi:  
681 10.1128/IAI.73.9.5978-5987.2005. PubMed PMID: 16113318; PubMed Central PMCID:  
682 PMC1231098.
- 683 34. Chen L, Schiffer JM, Dalton S, Sabourin CL, Niemuth NA, Plikaytis BD, et al.  
684 Comprehensive analysis and selection of anthrax vaccine adsorbed immune correlates of  
685 protection in rhesus macaques. *Clin Vaccine Immunol.* 2014;21(11):1512-20. Epub  
686 2014/09/05. doi: 10.1128/CVI.00469-14. PubMed PMID: 25185577; PubMed Central  
687 PMCID: PMC4248764.
- 688 35. Glomski IJ, Piris-Gimenez A, Huerre M, Mock M, Goossens PL. Primary  
689 involvement of pharynx and peyer's patch in inhalational and intestinal anthrax. *PLoS*  
690 *Pathog.* 2007;3(6):e76. Epub 2007/06/05. doi: 10.1371/journal.ppat.0030076. PubMed  
691 PMID: 17542645; PubMed Central PMCID: PMC1885272.
- 692 36. Ingram R, Baillie L. It's in the genes! Human genetic diversity and the response to  
693 anthrax vaccines. *Expert Rev Vaccines.* 2012;11(6):633-5. Epub 2012/08/10. doi:  
694 10.1586/erv.12.41. PubMed PMID: 22873120.
- 695 37. Garman L, Dumas EK, Kurella S, Hunt JJ, Crowe SR, Nguyen ML, et al. MHC  
696 class II and non-MHC class II genes differentially influence humoral immunity to  
697 *Bacillus anthracis* lethal factor and protective antigen. *Toxins (Basel).* 2012;4(12):1451-  
698 67. Epub 2013/01/25. PubMed PMID: 23342680; PubMed Central PMCID:  
699 PMC3528256.
- 700 38. Pajewski NM, Parker SD, Poland GA, Ovsyannikova IG, Song W, Zhang K, et al.  
701 The role of HLA-DR-DQ haplotypes in variable antibody responses to anthrax vaccine  
702 adsorbed. *Genes Immun.* 2011;12(6):457-65. Epub 2011/03/04. doi:  
703 10.1038/gene.2011.15. PubMed PMID: 21368772; PubMed Central PMCID:  
704 PMC3165112.



- 705 39. Li ZK, Nie JJ, Li J, Zhuang H. The effect of HLA on immunological response to  
706 hepatitis B vaccine in healthy people: a meta-analysis. *Vaccine*. 2013;31(40):4355-61.  
707 Epub 2013/07/28. doi: 10.1016/j.vaccine.2013.06.108. PubMed PMID: 23887040.
- 708 40. Posteraro B, Pastorino R, Di Giannantonio P, Ianuale C, Amore R, Ricciardi W, et  
709 al. The link between genetic variation and variability in vaccine responses: systematic  
710 review and meta-analyses. *Vaccine*. 2014;32(15):1661-9. Epub 2014/02/12. doi:  
711 10.1016/j.vaccine.2014.01.057. PubMed PMID: 24513009.
- 712 41. Agrawal A, Lingappa J, Leppla SH, Agrawal S, Jabbar A, Quinn C, et al.  
713 Impairment of dendritic cells and adaptive immunity by anthrax lethal toxin. *Nature*.  
714 2003;424(6946):329-34. Epub 2003/07/18. doi: 10.1038/nature01794. PubMed PMID:  
715 12867985.
- 716 42. Phillips-Conroy JE, Hildebolt CF, Altmann J, Jolly CJ, Muruthi P. Periodontal  
717 health in free-ranging baboons of Ethiopia and Kenya. *Am J Phys Anthropol*.  
718 1993;90(3):359-71. Epub 1993/03/01. doi: 10.1002/ajpa.1330900310. PubMed PMID:  
719 8460659.
- 720 43. Nojima M, Ihara H, Kyo M, Hashimoto M, Ito K, Kunikata S, et al. The  
721 significant effect of HLA-DRB1 matching on acute rejection in kidney transplants.  
722 *Transpl Int*. 1996;9 Suppl 1:S11-5. Epub 1996/01/01. PubMed PMID: 8959780.
- 723 44. Ellmerich S, Takacs K, Mycko M, Waldner H, Wahid F, Boyton RJ, et al.  
724 Disease-related epitope spread in a humanized T cell receptor transgenic model of  
725 multiple sclerosis. *Eur J Immunol*. 2004;34(7):1839-48. Epub 2004/06/24. doi:  
726 10.1002/eji.200324044. PubMed PMID: 15214032.
- 727 45. Ellmerich S, Mycko M, Takacs K, Waldner H, Wahid FN, Boyton RJ, et al. High  
728 incidence of spontaneous disease in an HLA-DR15 and TCR transgenic multiple sclerosis  
729 model. *J Immunol*. 2005;174(4):1938-46. Epub 2005/02/09. PubMed PMID: 15699121.
- 730 46. Boyton RJ, Lohmann T, Londei M, Kalbacher H, Halder T, Frater AJ, et al.  
731 Glutamic acid decarboxylase T lymphocyte responses associated with susceptibility or  
732 resistance to type I diabetes: analysis in disease discordant human twins, non-obese  
733 diabetic mice and HLA-DQ transgenic mice. *Int Immunol*. 1998;10(12):1765-76. Epub  
734 1999/01/14. PubMed PMID: 9885897.
- 735 47. Flick-Smith HC, Walker NJ, Gibson P, Bullifent H, Hayward S, Miller J, et al. A  
736 recombinant carboxy-terminal domain of the protective antigen of *Bacillus anthracis*  
737 protects mice against anthrax infection. *Infect Immun*. 2002;70(3):1653-6. Epub  
738 2002/02/21. PubMed PMID: 11854261; PubMed Central PMCID: PMC127760.
- 739 48. Texier C, Pouvelle S, Busson M, Herve M, Charron D, Menez A, et al. HLA-DR  
740 restricted peptide candidates for bee venom immunotherapy. *J Immunol*.  
741 2000;164(6):3177-84. Epub 2000/03/08. PubMed PMID: 10706708.
- 742 49. Pancre V, Georges B, Angyalosi G, Castelli F, Delanoye A, Delacre M, et al.  
743 Novel promiscuous HLA-DQ HIV Nef peptide that induces IFN-gamma-producing  
744 memory CD4+ T cells. *Clin Exp Immunol*. 2002;129(3):429-37. Epub 2002/08/29. doi:  
745 10.1046/j.1365-2249.2002.01934.x. PubMed PMID: 12197883; PubMed Central  
746 PMCID: PMC1906467.
- 747 50. Petosa C, Collier RJ, Klimpel KR, Leppla SH, Liddington RC. Crystal structure  
748 of the anthrax toxin protective antigen. *Nature*. 1997;385(6619):833-8. Epub 1997/02/27.  
749 doi: 10.1038/385833a0. PubMed PMID: 9039918.
- 750

752

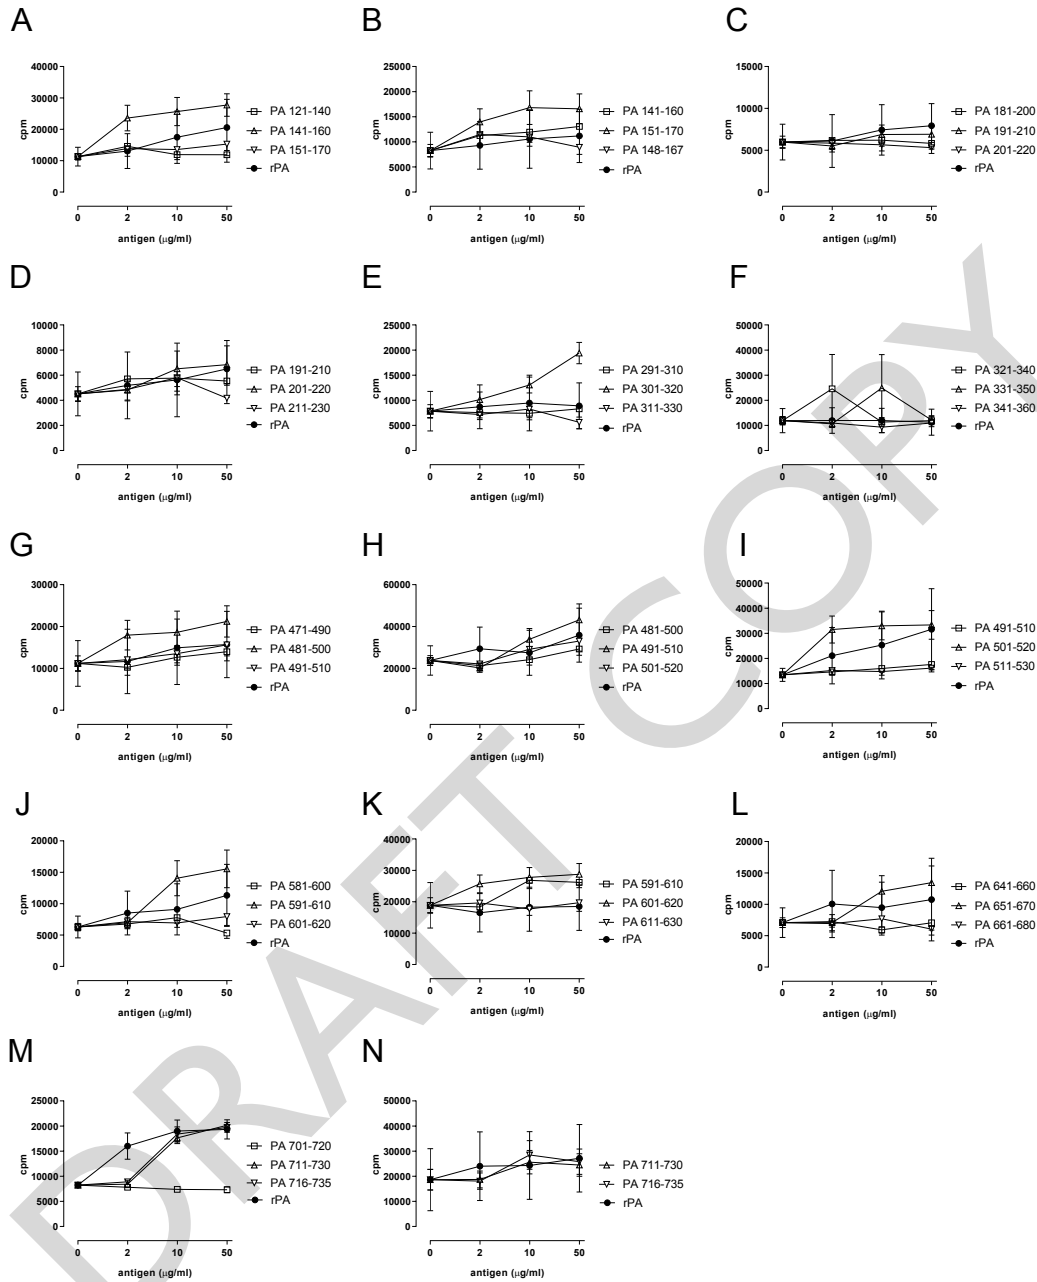

753

754

Supporting Figure 1.

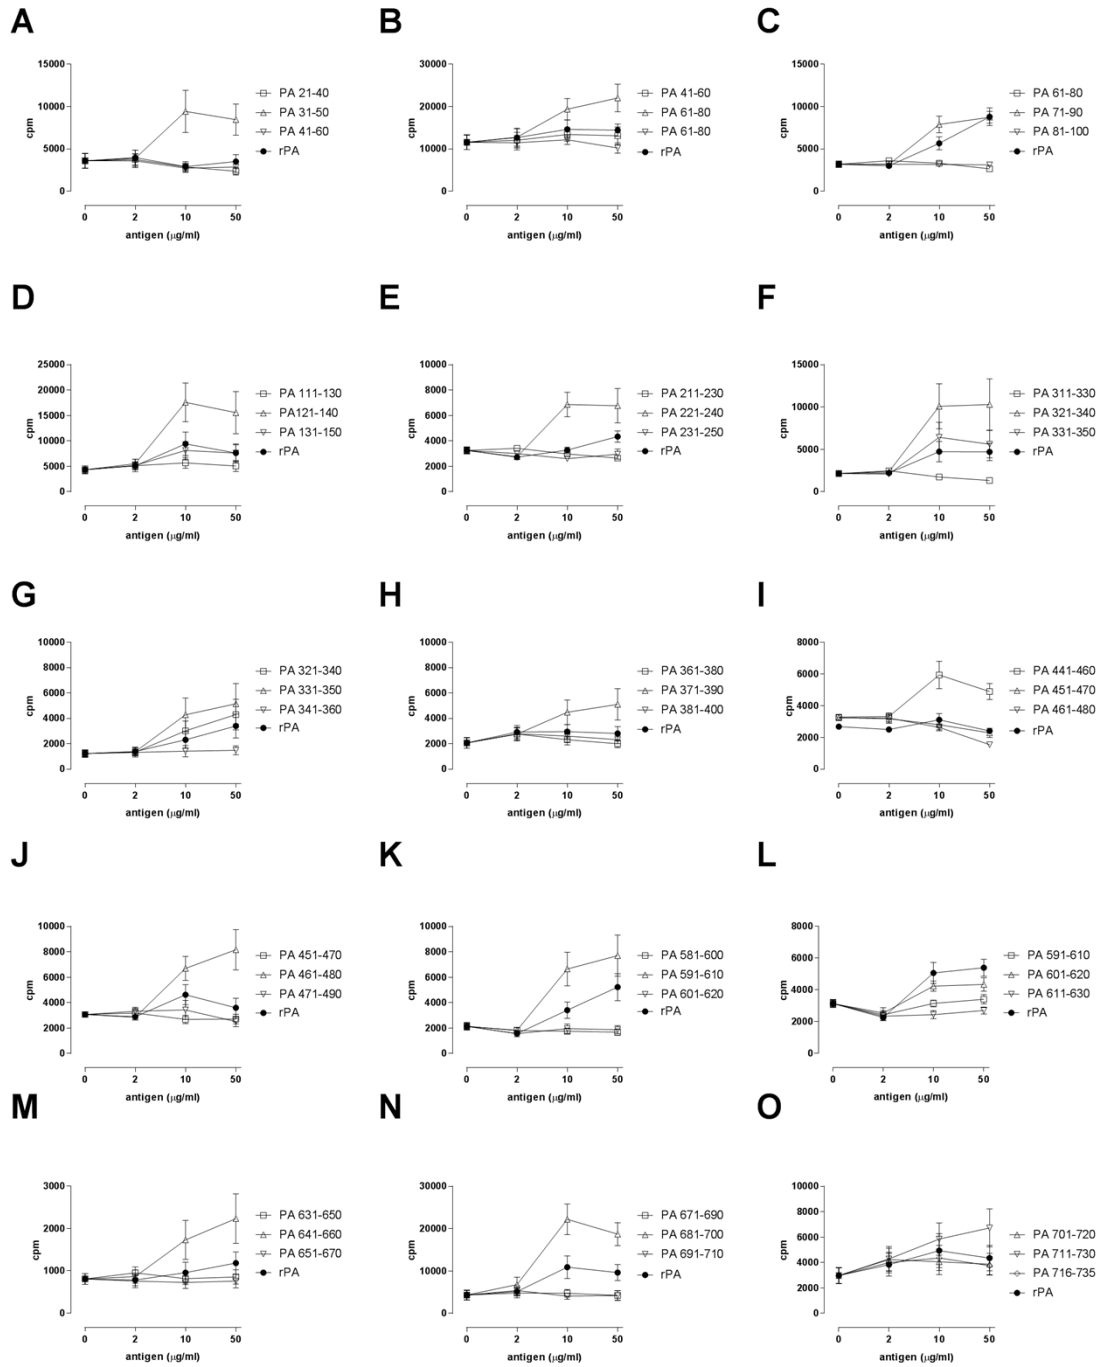

755  
756  
757

## Supporting Figure 2.

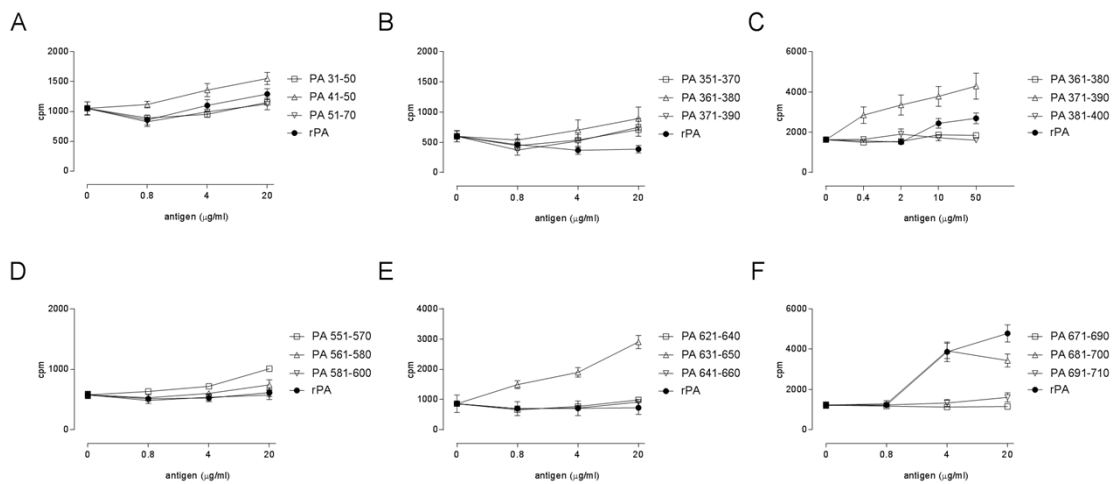

759  
760  
761

**Supporting Figure 3.**

DRAFT COPY

762 Supporting Table 1. CD4+ T cell responses to B. anthracis PA epitopes in AVP vaccinees.

| Human cohorts   | T cell response to anthrax PA domain I-IV epitopes, SFC/10 <sup>6</sup> cells |                 |    |           |   |   |       |       |       |       |        |         |         |         |         |         |         |         |         |         |         |         |         |         |         |         |         |         |         |         |         |         |     |
|-----------------|-------------------------------------------------------------------------------|-----------------|----|-----------|---|---|-------|-------|-------|-------|--------|---------|---------|---------|---------|---------|---------|---------|---------|---------|---------|---------|---------|---------|---------|---------|---------|---------|---------|---------|---------|---------|-----|
|                 | HLA class II                                                                  |                 |    |           |   |   | 11-30 | 21-40 | 41-60 | 61-80 | 81-100 | 141-160 | 161-180 | 191-210 | 221-240 | 241-260 | 261-280 | 301-320 | 321-340 | 361-380 | 391-410 | 421-440 | 431-450 | 491-510 | 501-520 | 521-540 | 561-580 | 601-620 | 621-640 | 631-650 | 641-660 | 671-690 |     |
|                 | HLA-DRB1*                                                                     | HLA-DRB3*/4*/5* |    | HLA-DQB1* |   |   |       |       |       |       |        |         |         |         |         |         |         |         |         |         |         |         |         |         |         |         |         |         |         |         |         |         |     |
| AVP vaccinee 1  | 11                                                                            | 15              | 51 | 52        | 6 | 7 | 0     | 0     | 0     | 0     | 0      | 0       | 219     | 266     | 0       | 0       | 0       | 0       | 0       | 190     | 217     | 0       | 284     | 0       | 0       | 0       | 0       | 0       | 0       | 0       | 242     | 242     | 313 |
| AVP vaccinee 2  | 11                                                                            | 15              | 51 | 52        | 6 | 7 | 0     | 891   | 0     | 0     | 0      | 0       | 0       | 0       | 0       | 0       | 0       | 0       | 0       | 0       | 0       | 0       | 0       | 0       | 819     | 0       | 0       | 0       | 0       | 0       | 0       | 0       | 0   |
| AVP vaccinee 3  | 11                                                                            | 13              | 52 | -         | 6 | 7 | 1247  | 1177  | 1057  | 977   | 895    | 933     | 0       | 0       | 1159    | 1077    | 485     | 681     | 169     | 521     | 0       | 1123    | 1199    | 1109    | 1133    | 857     | 821     | 1015    | 1077    | 0       | 0       | 1079    |     |
| AVP vaccinee 4  | 15                                                                            | 7               | 51 | 53        | 2 | 6 | 0     | 0     | 0     | 0     | 0      | 0       | 0       | 0       | 519     | 0       | 309     | 0       | 0       | 0       | 0       | 0       | 0       | 0       | 0       | 0       | 0       | 0       | 0       | 0       | 0       | 0       | 0   |
| AVP vaccinee 5  | 103                                                                           | 17              | 52 | -         | 2 | 5 | 0     | 0     | 0     | 0     | 0      | 0       | 0       | 0       | 0       | 0       | 0       | 0       | 0       | 0       | 0       | 0       | 0       | 0       | 0       | 0       | 0       | 0       | 0       | 0       | 0       | 0       | 0   |
| AVP vaccinee 6  | 1                                                                             | 13              | 52 | -         | 5 | 6 | 0     | 0     | 0     | 0     | 0      | 0       | 0       | 0       | 0       | 0       | 0       | 0       | 0       | 0       | 0       | 0       | 0       | 0       | 0       | 0       | 0       | 0       | 0       | 0       | 0       | 0       | 0   |
| AVP vaccinee 7  | 11                                                                            | 15              | 51 | 52        | 6 | 7 | 0     | 0     | 0     | 0     | 0      | 0       | 0       | 0       | 0       | 0       | 0       | 0       | 0       | 0       | 0       | 0       | 0       | 0       | 0       | 0       | 0       | 0       | 0       | 0       | 0       | 0       | 0   |
| AVP vaccinee 8  | 1                                                                             | -               | -  | -         | 5 | - | 0     | 0     | 0     | 0     | 0      | 0       | 0       | 0       | 0       | 0       | 0       | 0       | 0       | 0       | 0       | 0       | 0       | 0       | 0       | 0       | 0       | 0       | 0       | 0       | 0       | 0       | 0   |
| AVP vaccinee 9  | 4                                                                             | 12              | 52 | 53        | 7 | 8 | 0     | 0     | 0     | 0     | 0      | 0       | 0       | 0       | 0       | 0       | 0       | 0       | 0       | 0       | 0       | 0       | 0       | 0       | 0       | 0       | 0       | 0       | 0       | 0       | 0       | 0       | 0   |
| AVP vaccinee 10 | 7                                                                             | 15              | 51 | 53        | 2 | 6 | 0     | 0     | 0     | 0     | 0      | 0       | 0       | 0       | 0       | 0       | 0       | 0       | 0       | 0       | 0       | 0       | 0       | 0       | 0       | 0       | 0       | 0       | 0       | 0       | 0       | 0       | 0   |

764  
765  
766

**Supporting Table 2. CD4+ T cell responses to B. anthracis PA epitopes in anthrax-recovered patients.**

| Human cohorts    | T cell response to anthrax PA domain I-IV epitopes, SFC/10 <sup>6</sup> cells |                 |           |    |   |   |      |       |       |       |       |       |       |       |        |        |         |         |         |         |         |     |
|------------------|-------------------------------------------------------------------------------|-----------------|-----------|----|---|---|------|-------|-------|-------|-------|-------|-------|-------|--------|--------|---------|---------|---------|---------|---------|-----|
|                  | HLA class II                                                                  |                 |           |    |   |   | 1-20 | 11-30 | 21-40 | 31-50 | 41-60 | 51-70 | 61-80 | 71-90 | 81-100 | 91-110 | 101-120 | 121-140 | 131-150 | 141-160 | 151-170 |     |
|                  | HLA-DRB1*                                                                     | HLA-DRB3*/4*/5* | HLA-DQB1* |    |   |   |      |       |       |       |       |       |       |       |        |        |         |         |         |         |         |     |
| Infected donor 1 | 11                                                                            | 13              | 52        | -  | 6 | 7 | 0    | 0     | 0     | 0     | 0     | 0     | 0     | 0     | 0      | 0      | 0       | 0       | 0       | 0       | 0       | 0   |
| Infected donor 2 | 4                                                                             | -               | 53        | -  | 8 | - | 299  | 330   | 301   | 263   | 224   | 0     | 203   | 0     | 0      | 0      | 0       | 0       | 304     | 299     | 417     |     |
| Infected donor 3 | 4                                                                             | 14              | 52        | 53 | 5 | 8 | 0    | 0     | 0     | 0     | 0     | 0     | 0     | 486   | 0      | 454    | 0       | 0       | 0       | 0       | 0       | 0   |
| Infected donor 4 | 15                                                                            | -               | 51        | -  | 6 | - | 0    | 0     | 0     | 0     | 0     | 0     | 0     | 0     | 0      | 0      | 0       | 0       | 0       | 0       | 0       | 0   |
| Infected donor 5 | 8                                                                             | 11              | 52        | -  | 7 | - | 0    | 0     | 0     | 0     | 0     | 0     | 0     | 0     | 0      | 0      | 0       | 0       | 0       | 0       | 0       | 977 |
| Infected donor 6 | 11                                                                            | 13              | 52        | -  | 6 | 7 | 0    | 0     | 0     | 0     | 0     | 0     | 0     | 0     | 0      | 0      | 0       | 581     | 0       | 0       | 0       | 0   |
| Infected donor 7 | 4                                                                             | 14              | 52        | 53 | 5 | - | 0    | 0     | 1017  | 0     | 971   | 723   | 1193  | 957   | 1225   | 949    | 793     | 451     | 0       | 505     | 691     |     |
| Infected donor 8 | 1                                                                             | 16              | 51        | -  | 5 | - | 0    | 0     | 0     | 0     | 759   | 784   | 0     | 0     | 0      | 0      | 0       | 0       | 0       | 0       | 0       | 0   |
| Infected donor 9 | 15                                                                            | 13              | 51        | 52 | 6 | - | 0    | 0     | 0     | 0     | 0     | 0     | 0     | 0     | 0      | 0      | 0       | 0       | 0       | 0       | 0       | 0   |

767

| Human cohorts    | T cell response to anthrax PA domain I-IV epitopes, SFC/10 <sup>6</sup> cells |         |         |         |         |         |         |         |         |         |         |         |         |         |         |         |         |  |
|------------------|-------------------------------------------------------------------------------|---------|---------|---------|---------|---------|---------|---------|---------|---------|---------|---------|---------|---------|---------|---------|---------|--|
|                  | 148-167                                                                       | 168-187 | 161-180 | 171-190 | 181-200 | 191-210 | 211-230 | 221-240 | 231-250 | 241-260 | 261-280 | 271-290 | 281-300 | 301-320 | 311-330 | 321-340 | 331-350 |  |
| Infected donor 1 | 0                                                                             | 0       | 0       | 0       | 0       | 0       | 0       | 0       | 0       | 0       | 0       | 0       | 0       | 0       | 0       | 0       | 0       |  |
| Infected donor 2 | 337                                                                           | 383     | 349     | 268     | 0       | 229     | 229     | 246     | 0       | 304     | 0       | 0       | 0       | 176     | 0       | 0       | 0       |  |
| Infected donor 3 | 0                                                                             | 0       | 0       | 0       | 0       | 0       | 0       | 0       | 0       | 0       | 0       | 0       | 0       | 0       | 0       | 0       | 0       |  |
| Infected donor 4 | 0                                                                             | 0       | 0       | 0       | 0       | 0       | 0       | 0       | 0       | 0       | 0       | 0       | 0       | 0       | 0       | 0       | 0       |  |
| Infected donor 5 | 0                                                                             | 0       | 0       | 0       | 0       | 0       | 0       | 0       | 0       | 0       | 0       | 0       | 0       | 0       | 0       | 0       | 0       |  |
| Infected donor 6 | 0                                                                             | 0       | 0       | 0       | 0       | 0       | 0       | 0       | 0       | 0       | 0       | 0       | 641     | 0       | 0       | 0       | 477     |  |
| Infected donor 7 | 1013                                                                          | 919     | 1251    | 915     | 911     | 921     | 0       | 0       | 1117    | 711     | 757     | 1063    | 759     | 649     | 799     | 805     | 685     |  |
| Infected donor 8 | 0                                                                             | 813     | 0       | 0       | 0       | 0       | 0       | 0       | 0       | 0       | 723     | 0       | 0       | 0       | 0       | 212     | 0       |  |
| Infected donor 9 | 0                                                                             | 263     | 0       | 0       | 0       | 0       | 0       | 0       | 0       | 0       | 0       | 0       | 0       | 0       | 0       | 0       | 0       |  |

768

T cell response to anthrax PA domain I-IV epitopes, SFC/106 cells

| Human cohorts    | 341-360 | 351-370 | 361-380 | 371-390 | 381-400 | 391-410 | 401-420 | 411-430 | 421-440 | 431-450 | 441-460 | 451-470 | 461-480 | 471-490 | 481-500 | 491-510 | 501-520 |
|------------------|---------|---------|---------|---------|---------|---------|---------|---------|---------|---------|---------|---------|---------|---------|---------|---------|---------|
| Infected donor 1 | 0       | 0       | 0       | 0       | 0       | 0       | 0       | 0       | 0       | 0       | 0       | 0       | 0       | 0       | 0       | 0       | 0       |
| Infected donor 2 | 0       | 263     | 325     | 304     | 0       | 263     | 215     | 268     | 323     | 299     | 0       | 232     | 179     | 222     | 0       | 325     | 289     |
| Infected donor 3 | 0       | 0       | 0       | 0       | 0       | 0       | 0       | 0       | 0       | 0       | 0       | 0       | 0       | 0       | 0       | 0       | 0       |
| Infected donor 4 | 0       | 0       | 0       | 0       | 0       | 0       | 0       | 0       | 0       | 0       | 0       | 0       | 0       | 0       | 0       | 0       | 0       |
| Infected donor 5 | 0       | 0       | 0       | 0       | 0       | 0       | 0       | 0       | 0       | 0       | 0       | 0       | 0       | 0       | 0       | 0       | 0       |
| Infected donor 6 | 0       | 0       | 0       | 0       | 0       | 0       | 0       | 0       | 0       | 599     | 801     | 0       | 0       | 0       | 577     | 0       | 0       |
| Infected donor 7 | 891     | 0       | 747     | 735     | 855     | 1199    | 0       | 0       | 859     | 1039    | 0       | 899     | 0       | 0       | 807     | 0       | 661     |
| Infected donor 8 | 0       | 0       | 0       | 0       | 0       | 0       | 0       | 0       | 0       | 0       | 0       | 0       | 0       | 0       | 0       | 0       | 0       |
| Infected donor 9 | 0       | 0       | 0       | 0       | 0       | 0       | 0       | 0       | 0       | 0       | 0       | 0       | 0       | 0       | 0       | 0       | 0       |

769

T cell response to anthrax PA domain I-IV epitopes, SFC/106 cells

| Human cohorts    | 511-530 | 521-540 | 531-550 | 541-560 | 551-570 | 561-580 | 571-590 | 581-600 | 591-610 | 601-620 | 611-630 | 621-640 | 631-650 | 641-660 | 651-670 | 661-680 | 671-690 |
|------------------|---------|---------|---------|---------|---------|---------|---------|---------|---------|---------|---------|---------|---------|---------|---------|---------|---------|
| Infected donor 1 | 0       | 0       | 0       | 0       | 0       | 0       | 0       | 0       | 0       | 0       | 0       | 0       | 0       | 0       | 0       | 0       | 0       |
| Infected donor 2 | 241     | 234     | 0       | 306     | 0       | 0       | 0       | 0       | 232     | 234     | 301     | 311     | 414     | 357     | 270     | 256     | 222     |
| Infected donor 3 | 0       | 0       | 0       | 0       | 0       | 0       | 396     | 0       | 0       | 0       | 0       | 0       | 0       | 0       | 0       | 0       | 0       |
| Infected donor 4 | 0       | 0       | 0       | 0       | 0       | 0       | 0       | 0       | 0       | 0       | 0       | 0       | 0       | 0       | 0       | 0       | 0       |
| Infected donor 5 | 1061    | 0       | 0       | 0       | 0       | 0       | 0       | 0       | 0       | 0       | 0       | 0       | 0       | 0       | 0       | 0       | 0       |
| Infected donor 6 | 0       | 0       | 603     | 0       | 0       | 0       | 495     | 779     | 0       | 0       | 0       | 0       | 539     | 0       | 0       | 0       | 545     |
| Infected donor 7 | 419     | 815     | 995     | 1391    | 881     | 1085    | 983     | 619     | 0       | 0       | 0       | 621     | 1043    | 0       | 893     | 705     | 993     |
| Infected donor 8 | 0       | 617     | 846     | 0       | 0       | 0       | 0       | 0       | 0       | 0       | 0       | 0       | 0       | 0       | 823     | 0       | 0       |
| Infected donor 9 | 0       | 0       | 0       | 0       | 596     | 0       | 0       | 0       | 0       | 0       | 0       | 0       | 0       | 0       | 474     | 0       | 0       |

770

771

772

773

| Human cohorts    | T cell response to anthrax PA domain I-IV epitopes, SFC/106 cells |         |         |
|------------------|-------------------------------------------------------------------|---------|---------|
|                  | 681-700                                                           | 691-710 | 716-735 |
| Infected donor 1 | 0                                                                 | 0       | 0       |
| Infected donor 2 | 0                                                                 | 210     | 0       |
| Infected donor 3 | 532                                                               | 0       | 0       |
| Infected donor 4 | 0                                                                 | 0       | 0       |
| Infected donor 5 | 0                                                                 | 0       | 0       |
| Infected donor 6 | 905                                                               | 0       | 0       |
| Infected donor 7 | 929                                                               | 1121    | 869     |
| Infected donor 8 | 0                                                                 | 0       | 0       |
| Infected donor 9 | 0                                                                 | 0       | 0       |

774

DRAFT COPY



776 **Supporting Table 3. Differential susceptibility of HLA class II transgenic mice to anthrax infection.**

777  
778  
779  
780  
781  
782  
783  
784  
785  
786  
787  
788  
789  
790  
791  
792  
793  
794  
795  
796  
797  
798  
799  
800  
801  
802  
803  
804  
805  
806

| HLA    | <i>B. anthracis</i> STI challenge dose (CFU) | Number of mice challenged | Number of challenge survivors | Mean time to death (days) | Bacterial load in spleens within observation period post-infection mean CFU/spleen ( $\pm$ SEM) | Bacterial load in spleens of survivors at day 20 mean CFU/spleen ( $\pm$ SEM) | Estimated LD <sub>50</sub> (CFU) |
|--------|----------------------------------------------|---------------------------|-------------------------------|---------------------------|-------------------------------------------------------------------------------------------------|-------------------------------------------------------------------------------|----------------------------------|
| C57Bl6 | 10 <sup>5</sup>                              | 10                        | 4                             | 4.5 ( $\pm$ 0.22)         | 1.0x10 <sup>3</sup> ( $\pm$ 0.32x10 <sup>3</sup> ) (n=6)                                        | 91 ( $\pm$ 18)                                                                | 10 <sup>5</sup>                  |
| DQ6    | 10 <sup>5</sup>                              | 8                         | 8                             | -                         | -                                                                                               | 255 ( $\pm$ 39)                                                               | >10 <sup>5</sup>                 |
| DR4    | 10 <sup>5</sup>                              | 10                        | 8                             | 7 ( $\pm$ 3)              | 1.27x10 <sup>3</sup> (n=1)                                                                      | 22 ( $\pm$ 13)                                                                | >10 <sup>5</sup>                 |
| DR15   | 10 <sup>5</sup>                              | 9                         | 5                             | 5.75 ( $\pm$ 0.48)        | 0.85x10 <sup>3</sup> ( $\pm$ 0.21 x10 <sup>3</sup> ) (n=4)                                      | 67 ( $\pm$ 32)                                                                | 10 <sup>5</sup>                  |
| DQ8    | 10 <sup>6</sup>                              | 10                        | 8                             | 6                         | 2.17x10 <sup>3</sup> ( $\pm$ 0.67x10 <sup>3</sup> ) (n=2)                                       | 896 ( $\pm$ 263)                                                              | >10 <sup>6</sup>                 |
| DR1    | 10 <sup>6</sup>                              | 10                        | 10                            | -                         | -                                                                                               | 411 ( $\pm$ 93)                                                               | >10 <sup>6</sup>                 |

## 807 **Figure Captions**

808

### 809 **Figure 1. Heat map of CD4+ T cell epitope responses to anthrax PA domain I-IV** 810 **peptides in human donors.**

811 Heat map representation of the epitope mapping results observed for positive CD4+ T  
812 cell IFN $\gamma$  ELISpot responses in the human donor cohorts, comprising a total of 9 donors  
813 in the cutaneous anthrax (Kayseri) group and 10 donors in the AVP vaccinees (UK)  
814 group. Peptides were considered positive for the carriage of a CD4+ T cell epitope if the  
815 response was >50 SFC/10<sup>6</sup> PBMCs and 2SD above negative control, and the stimulation  
816 index (peptide response/negative control response) value was  $\geq 1.5$ . The domains were  
817 defined as described previously; domain 1 = PA 1-20 to PA 241-260; domain 2 = PA  
818 251-270 to PA 471-490; domain 3 = PA 491-510 to PA 581-600; domain 4 = PA 591-610  
819 to PA 716-735, with some peptides overlapping the boundaries between domains) [50].  
820 The colour bar at the right indicates the percentage of donors responding to a given  
821 epitope, with shading from white (0%) to dark blue (50%).

822

### 823 **Figure 2. Differential susceptibility of HLA class II transgenic mice to anthrax** 824 **infection.**

825 Groups of naïve HLA transgenic (DR1 n=11, DQ8 n=10, DR15 n=9, DR4 n=10, DQ6  
826 n=8) or C57Bl6 (n=10) mice were challenged with either 10<sup>5</sup> (C and D) or 10<sup>6</sup> (A and B)  
827 CFU *B. anthracis* STI strain, in order to compare susceptibility. Mice were challenged  
828 intraperitoneally and their survival observed for 20 days post-infection. Percentage  
829 survival, together with mean splenic bacterial counts per HLA type, is shown for mice  
830 succumbing within the observation period (days 1 to 19) and for survivors culled at day  
831 20. Statistical comparison of mean bacterial loads by mouse strain (D) indicated that  
832 higher bacterial loads were seen in DQ6 in comparison to; C57BL/6 (\*\* p=0.0093), DR4  
833 (\*\*\*\* p<0.0001) and DR15 (\*\* p=0.0014), (One-way ANOVA, Tukey's multiple  
834 comparisons).

835

### 836 **Figure 3. T-cell responses to PA peptides in whole rPA-immunised HLA-DR and** 837 **HLA-DQ transgenic mice.**

838 Groups of HLA transgenic mice were immunised with the whole rPA protein in adjuvant,  
839 and the proliferative responses of draining lymph node cells to overlapping synthetic  
840 peptides representing the complete PA sequence were determined. Scatter plots show  
841 responses of individual mice transgenic for (A) HLA-DR1 (n=3 for each peptide data  
842 point, and n=11 for the rPA data point), B) HLA-DQ8 (n=6 for each peptide data point,  
843 n=18 for the rPA data point) and C) HLA-DR4 (n=6 for each peptide data point, and  
844 n=17 for the rPA data point). Data is presented as the SI calculated as the mean CPM of  
845 triplicate wells in the presence of peptide divided by the mean CPM in the absence of  
846 antigen. Values twice the mean CPM in the absence of antigen were considered positive  
847 responses. Confirmed epitopes are highlighted in red.

848

### 849 **Supporting Figure 1. Fine specificity mapping of previously identified HLA-DQ8** 850 **restricted T cell epitopes.**

851 HLA-DQ8 transgenics were immunised with the previously identified PA peptide in  
852 adjuvant. The proliferative responses of draining lymph node cells were measured in  
853 response to the indicated concentrations of whole PA protein, domains I-IV of the protein  
854 and the immunising and flanking peptides. The responses are shown as the stimulation  
855 index calculated as the mean CPM of triplicate wells in the presence of peptide divided  
856 by the mean CPM in the absence of antigen. Values twice the mean CPM in the absence  
857 of antigen were considered positive responses (n=3 for each data point).

858

859 **Supporting Figure 2. Fine specificity mapping of previously identified HLA-DR4**  
860 **restricted T cell epitopes.**

861 HLA-DR4 transgenics were immunised with the previously identified PA peptide in  
862 adjuvant. The proliferative responses of draining lymph node cells were measured in  
863 response to the indicated concentrations of whole PA protein, domains I-IV of the protein  
864 and the immunising and flanking peptides. The responses are shown as the stimulation  
865 index calculated as the mean CPM of triplicate wells in the presence of peptide divided  
866 by the mean CPM in the absence of antigen. Values twice the mean CPM in the absence  
867 of antigen were considered positive responses (n=3 for each data point).

868

869 **Supporting Figure 3. Fine specificity mapping of previously identified HLA-DR1**  
870 **restricted T cell epitopes.**

871 HLA-DR1 transgenics were immunised with the previously identified PA peptide in  
872 adjuvant. The proliferative responses of draining lymph node cells were measured in  
873 response to the indicated concentrations of whole PA protein, domains I-IV of the protein  
874 and the immunising and flanking peptides. The responses are shown as the stimulation  
875 index calculated as the mean CPM of triplicate wells in the presence of peptide divided  
876 by the mean CPM in the absence of antigen. Values twice the mean CPM in the absence  
877 of antigen were considered positive responses (n=3 for each data point).

878

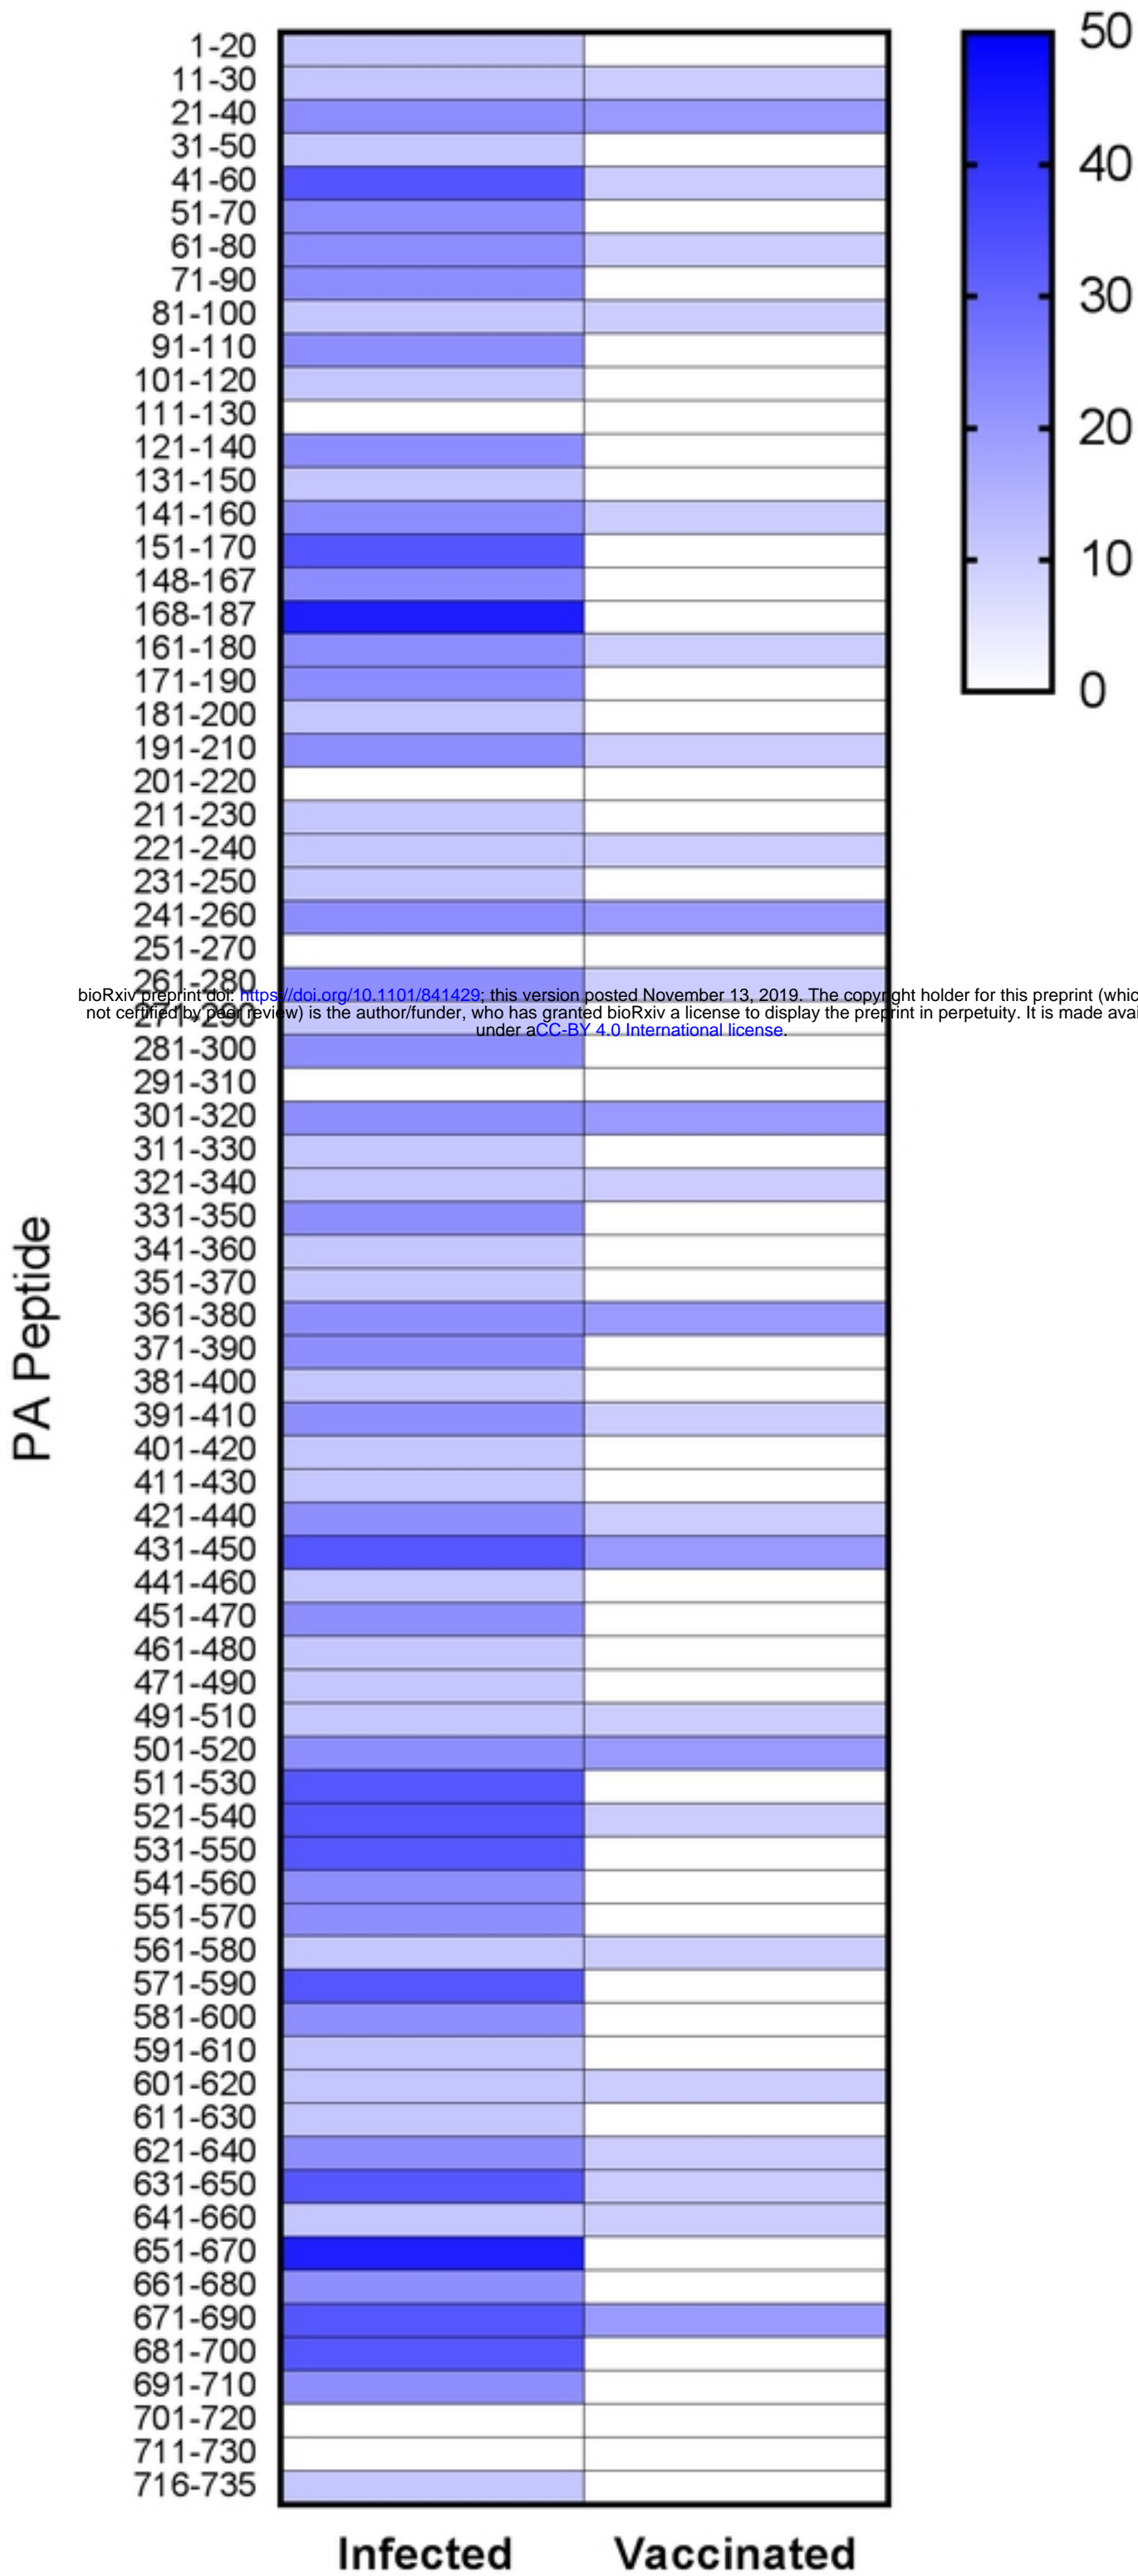

Figure

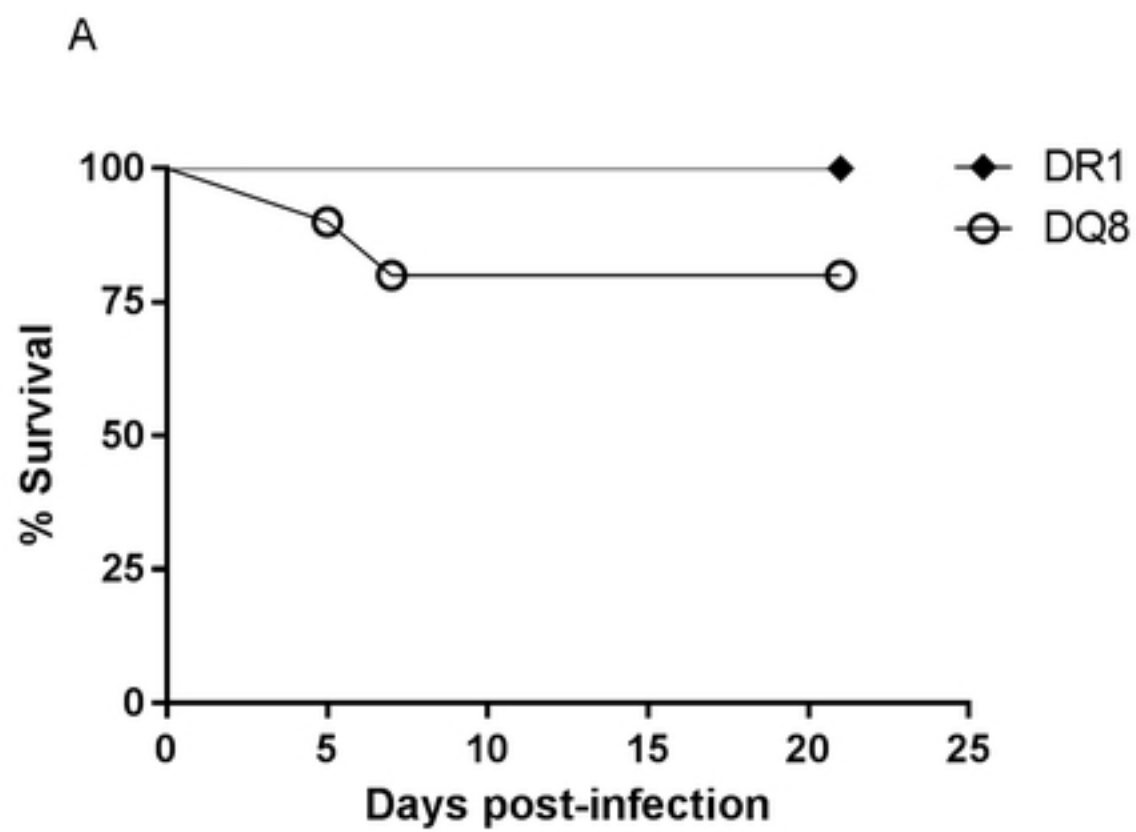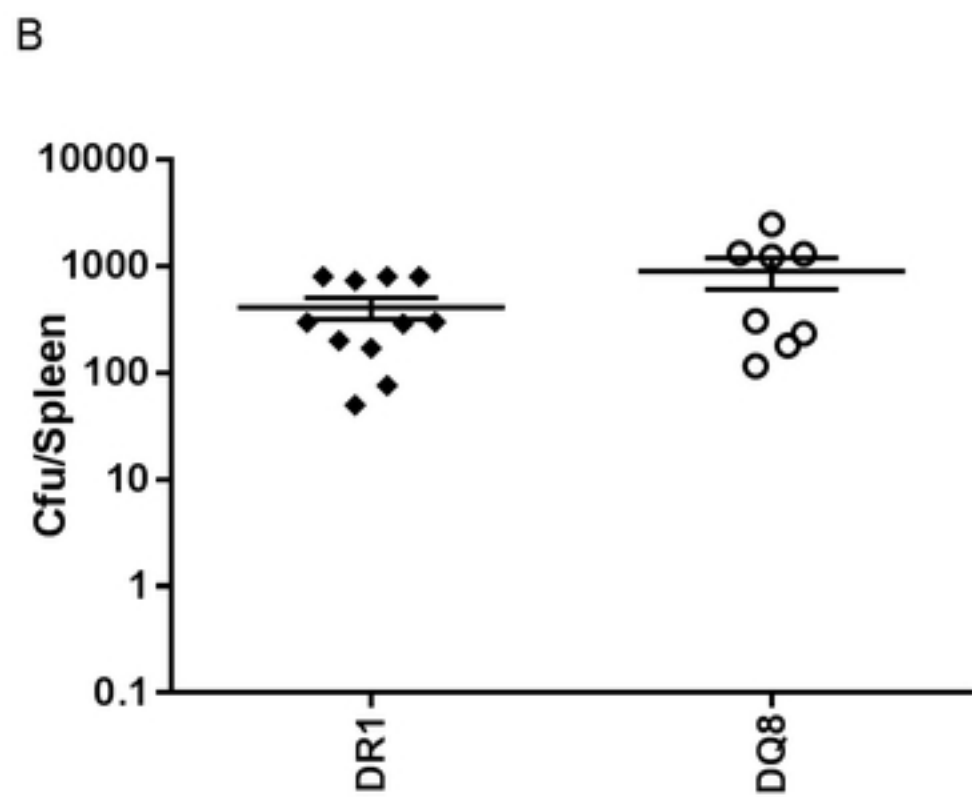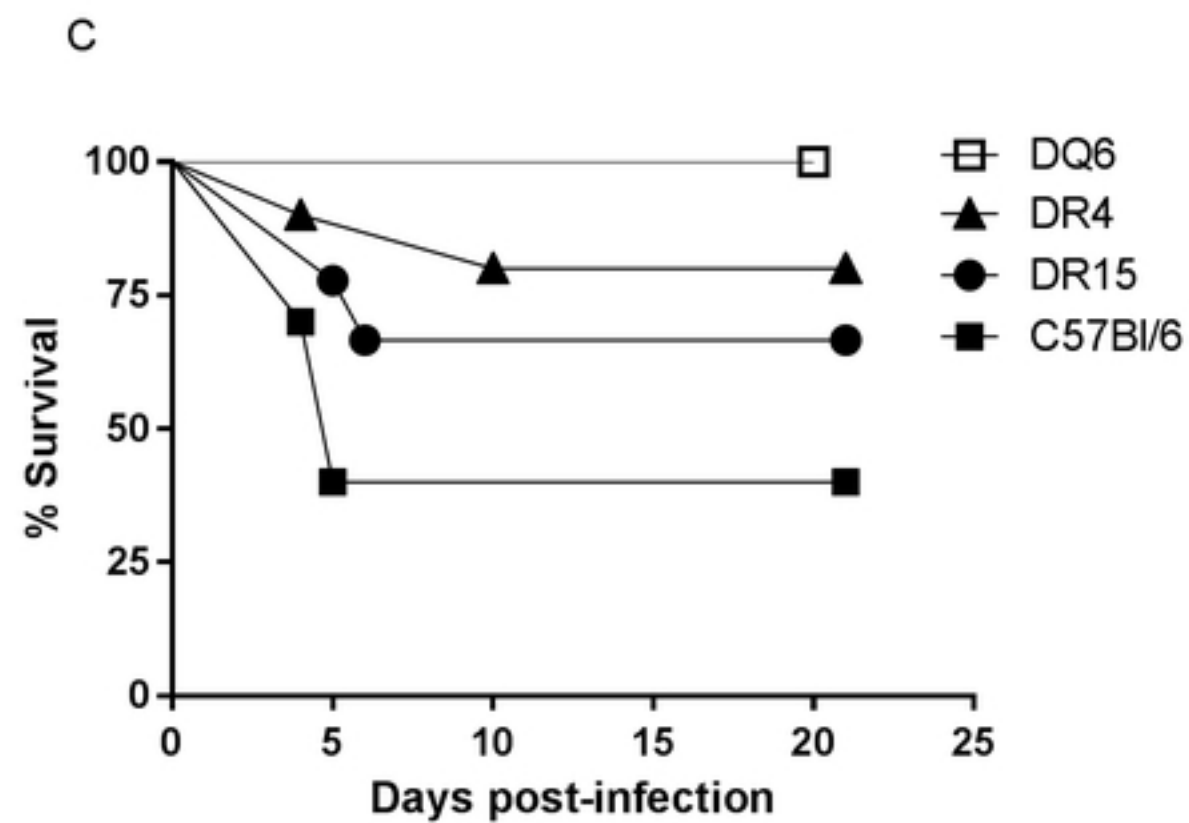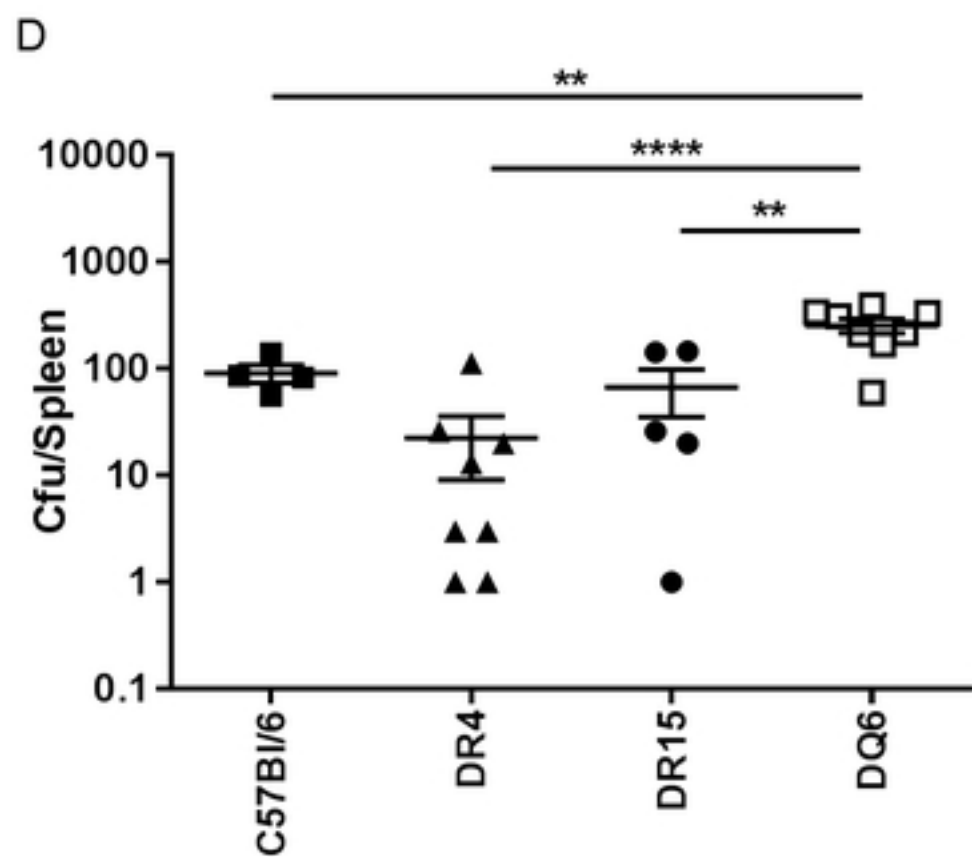

Figure

**A**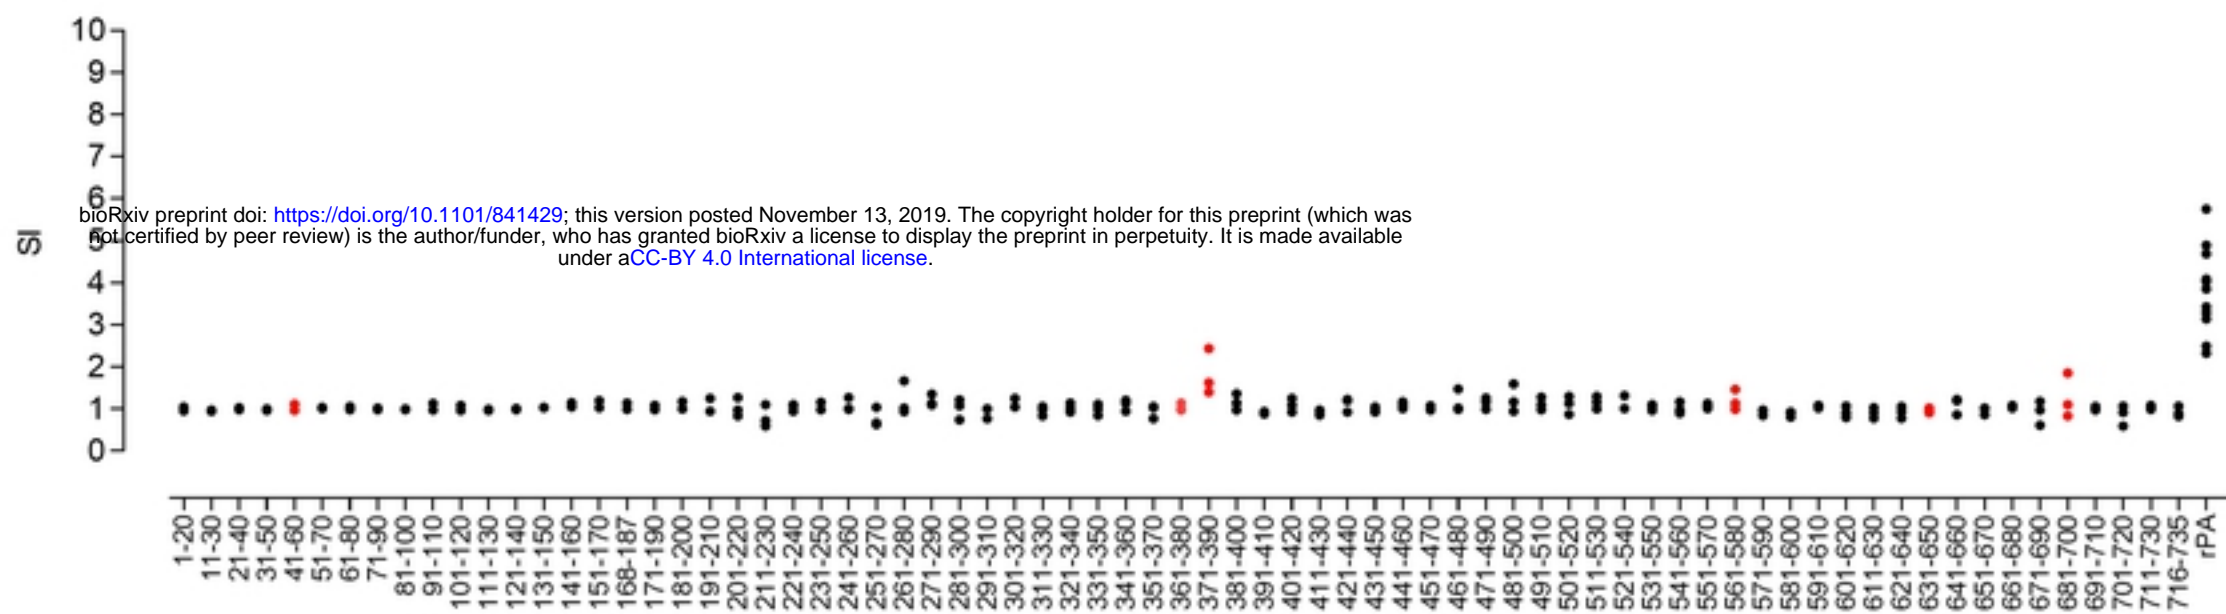**B**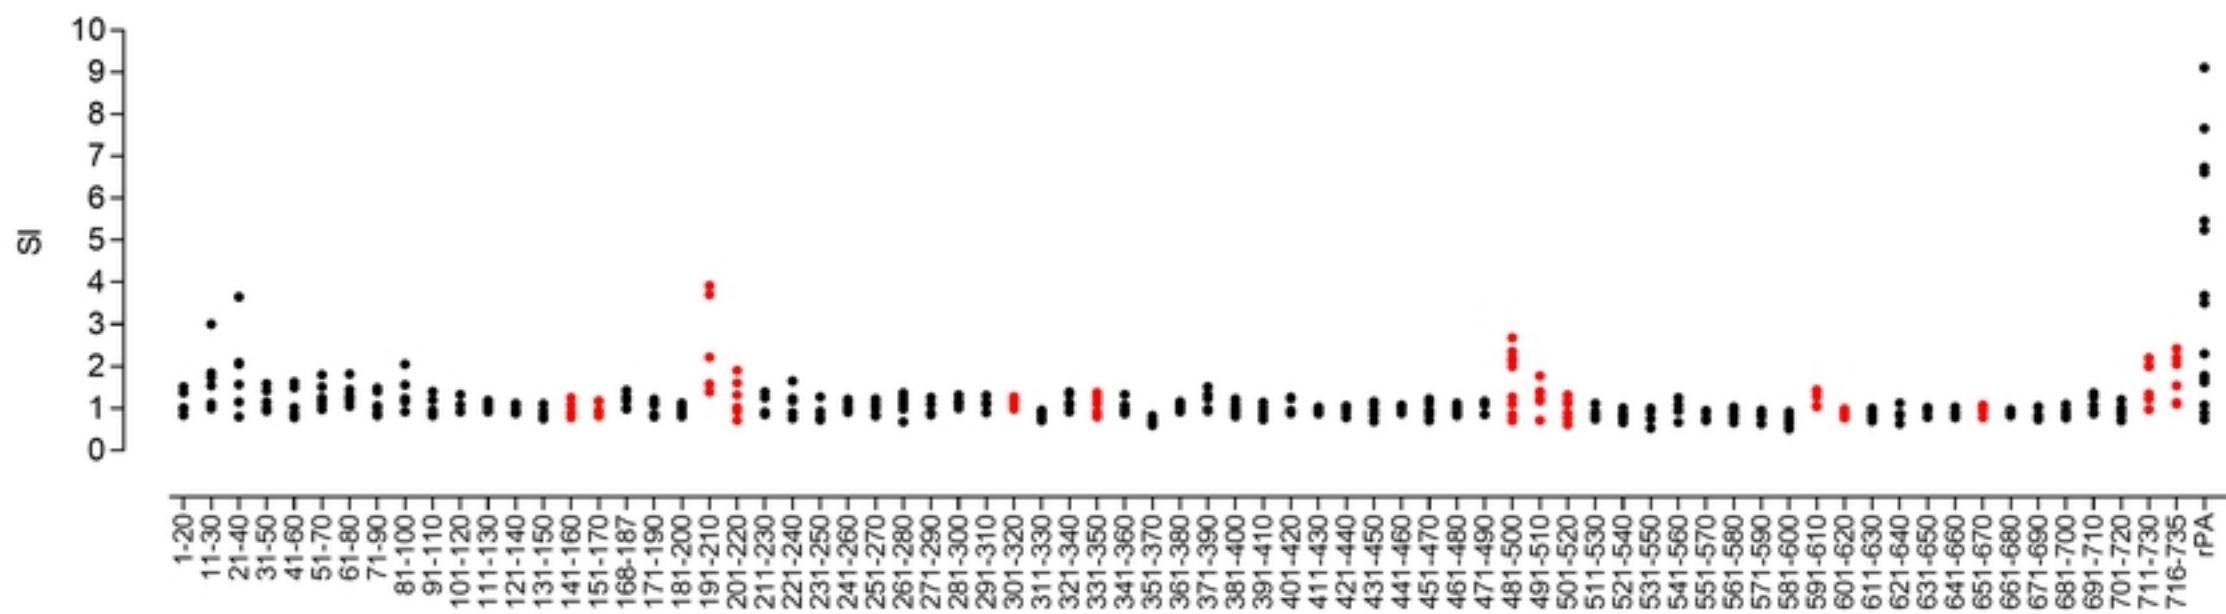**C**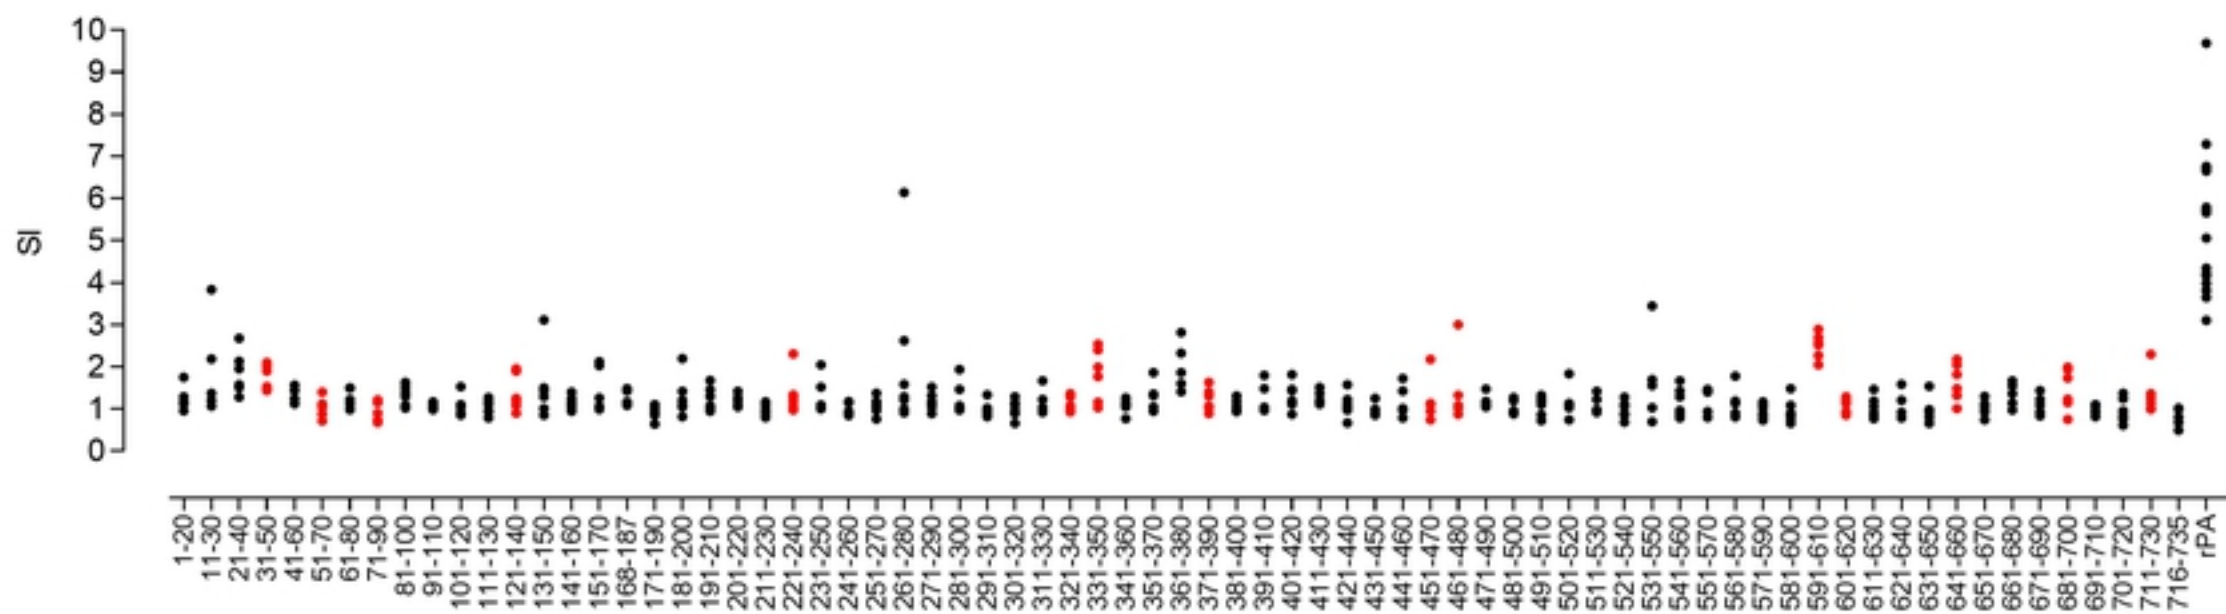

Source: https://www.biorxiv.org/content/biorxiv/early/2019/11/13/841429.full.pdf
